# Supplementary material for: Palladium complexes of N-heterocyclic carbenes displaying an unsymmetricalN-alkylfluorenyl/N′-aryl substitution pattern and their behaviour in Suzuki–Miyaura cross coupling
Source: Royal Society of Chemistry journal article supplement (doi:10.1039/c9dt02948f), 2019-01-01

## Supporting Information

### **Palladium complexes of N-heterocyclic carbenes displaying an unsymmetrical *N*-alkylfluorenyl/*N'*-aryl substitution pattern and their behaviour in Suzuki-Miyaura cross coupling**

Hamzé Almallah,<sup>a,b</sup> Eric Brenner,<sup>\*a</sup> Dominique Matt,<sup>\*a</sup> Jack Harrowfield,<sup>c</sup> Mohamad Jahjah<sup>b</sup> and Akram Hijazi<sup>b</sup>

<sup>a</sup>*Laboratoire de Chimie Inorganique Moléculaire et Catalyse, Institut de Chimie (UMR 7177 CNRS), Université de Strasbourg, 4 rue Blaise Pascal, 67070 Strasbourg Cedex, France. E-mail: eric.brenner@unistra.fr, dmatt@unistra.fr*

<sup>b</sup>*Inorganic and Organometallic Coordination Chemistry Laboratory, Faculty of Sciences, Lebanese University, R. Hariri University Campus, Beyrouth, Hadath, Lebanon*

<sup>c</sup>*Institut de Science et Ingénierie Supramoléculaires (ISIS), UMR 7606 CNRS, Université de Strasbourg, 8 rue Gaspard Monge, 67083 Strasbourg cedex, France*

Contents:

1) <sup>1</sup>H, <sup>13</sup>C{<sup>1</sup>H} and <sup>19</sup>F NMR spectra ————— S1-S30

# 1) $^1\text{H}$ , $^{13}\text{C}\{^1\text{H}\}$ and $^{19}\text{F}$ NMR spectra

$^1\text{H}$  NMR ( $\text{CDCl}_3$ , 300 MHz) of imidazolium  $3^{\text{H}}$

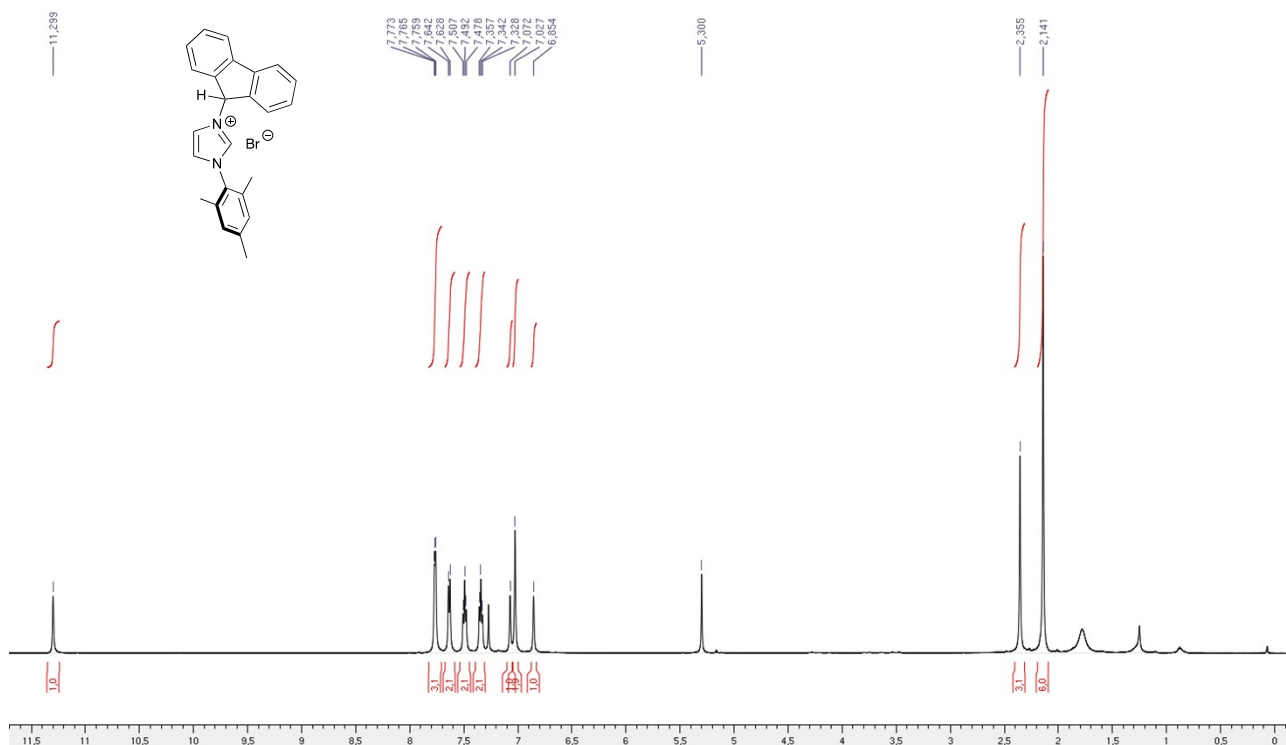

$^{13}\text{C}\{^1\text{H}\}$  and DEPT NMR ( $\text{CDCl}_3$ , 125 MHz) of imidazolium  $3^{\text{H}}$

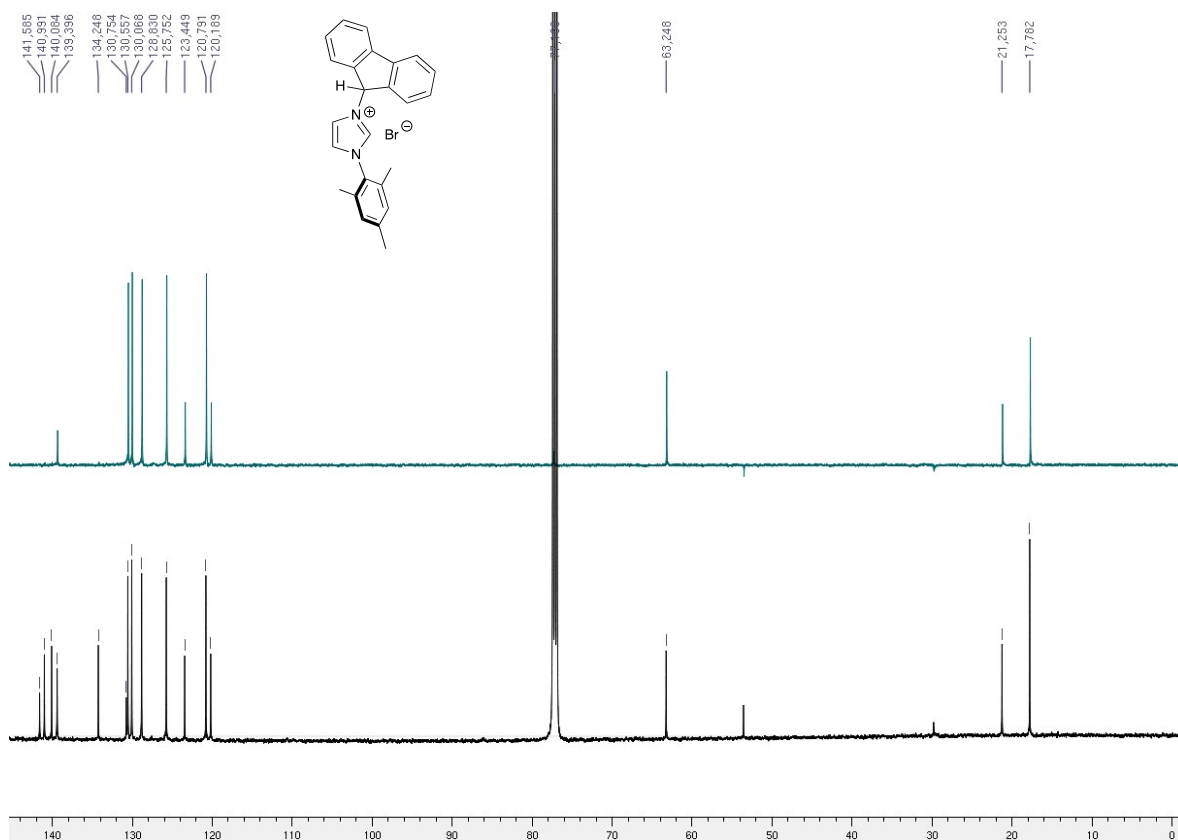

$^1\text{H}$  NMR ( $[\text{D}_6]$ DMSO, 500 MHz) of imidazolium  $4^{\text{H}}$

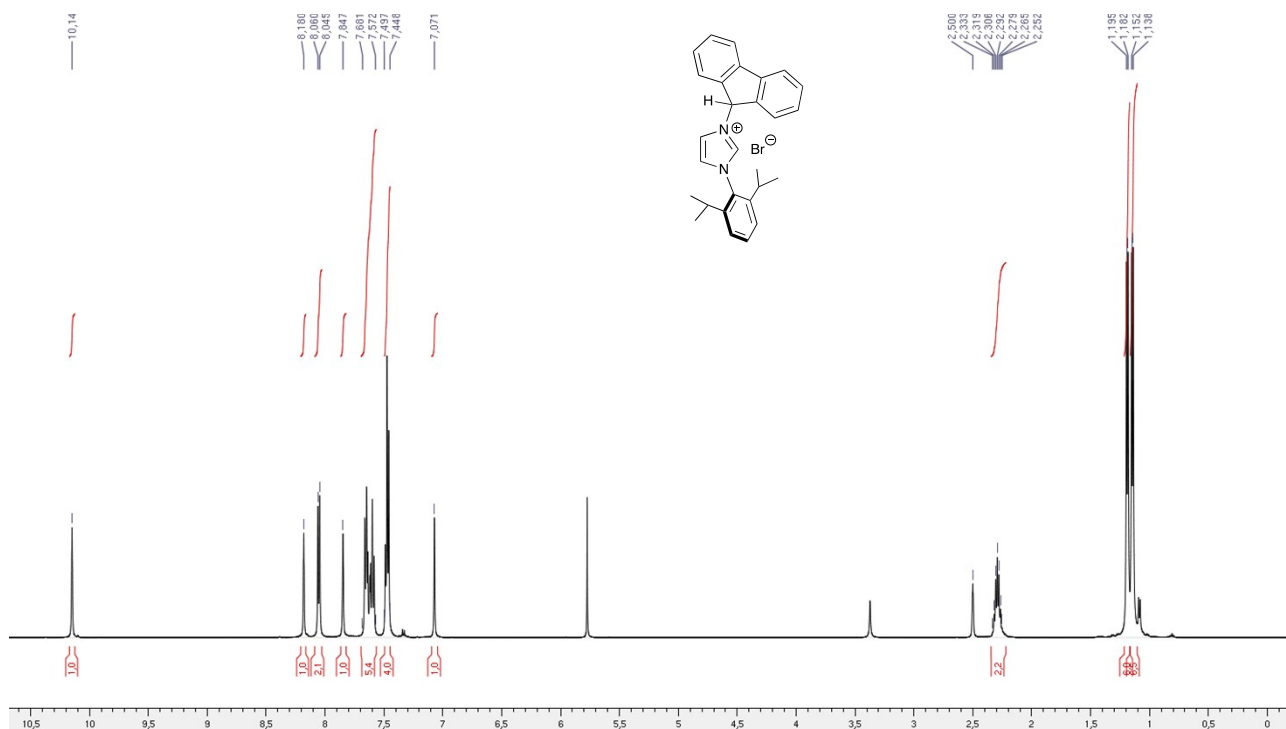

$^{13}\text{C}\{^1\text{H}\}$  and DEPT NMR ( $[\text{D}_6]$ DMSO, 125 MHz) of imidazolium  $4^{\text{H}}$

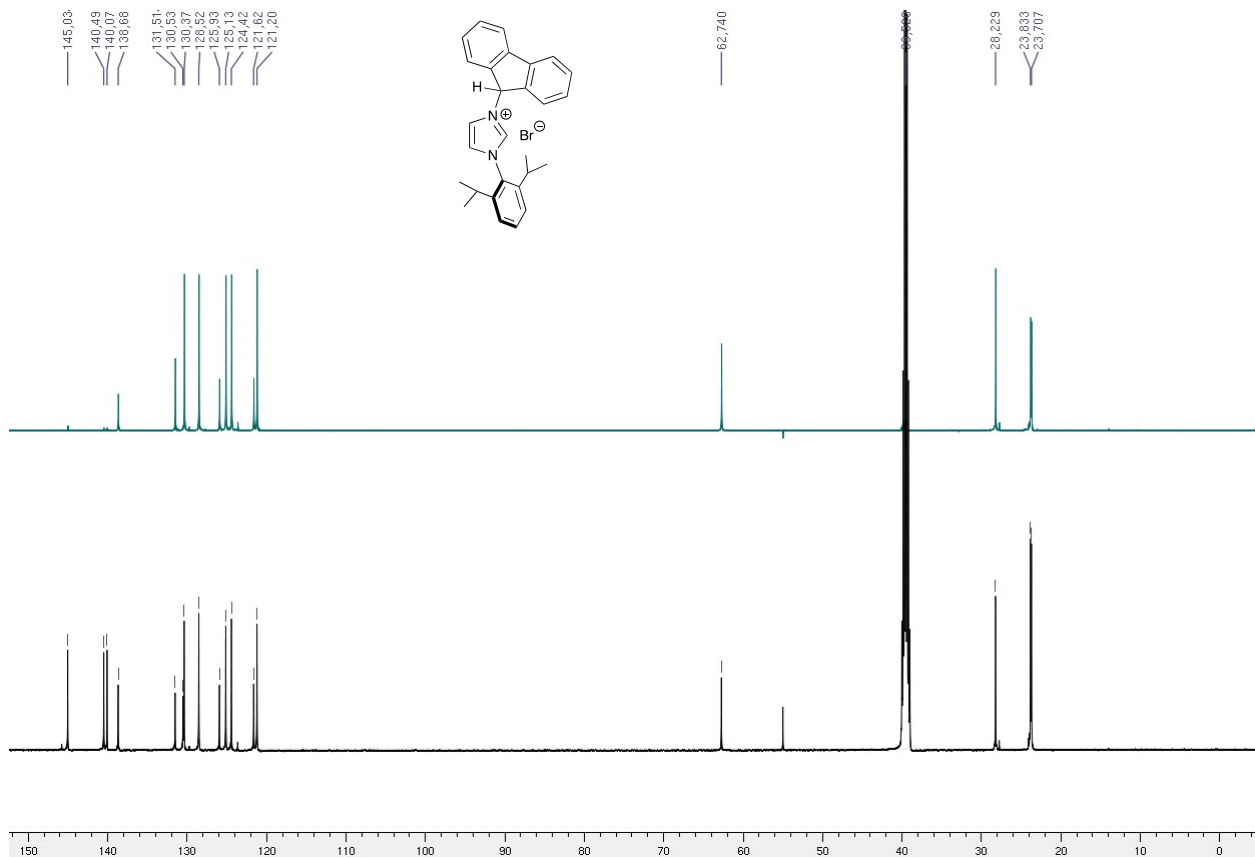

$^1\text{H}$  NMR ( $\text{CDCl}_3$ , 500 MHz) of imidazolium **3**\*Et

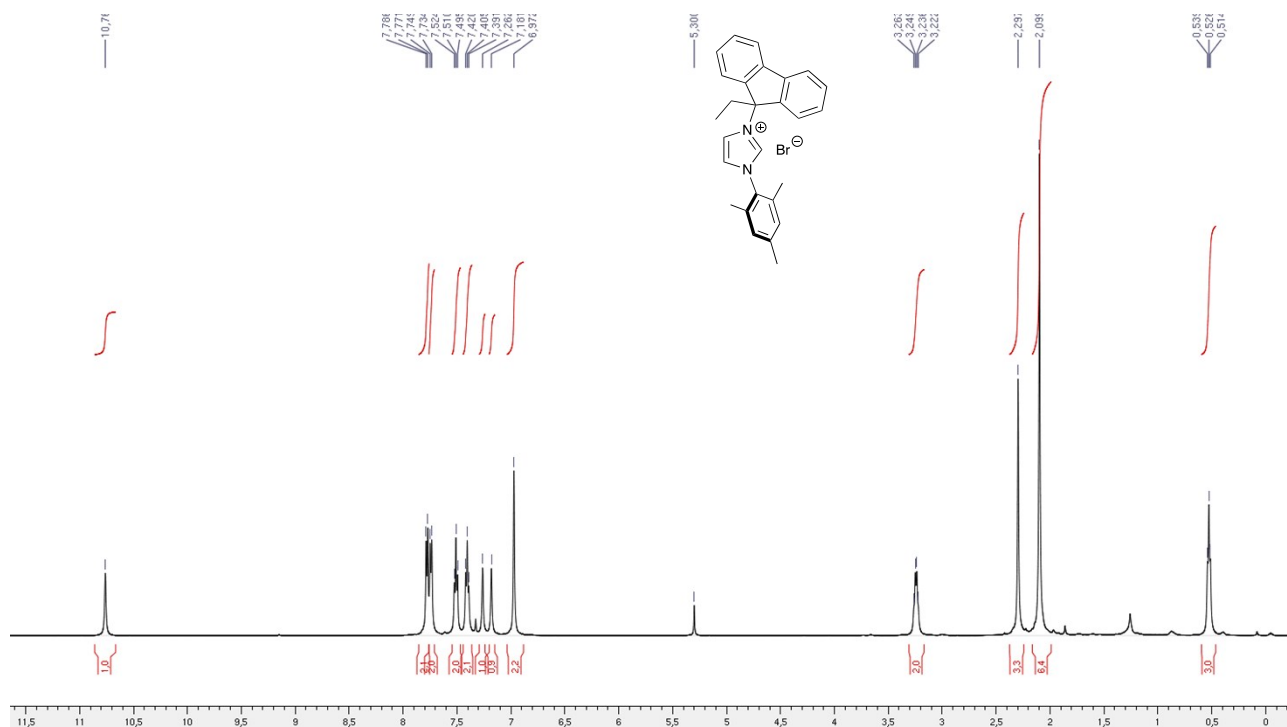

$^{13}\text{C}\{^1\text{H}\}$  and DEPT NMR ( $\text{CDCl}_3$ , 125 MHz) of imidazolium **3**\*Et

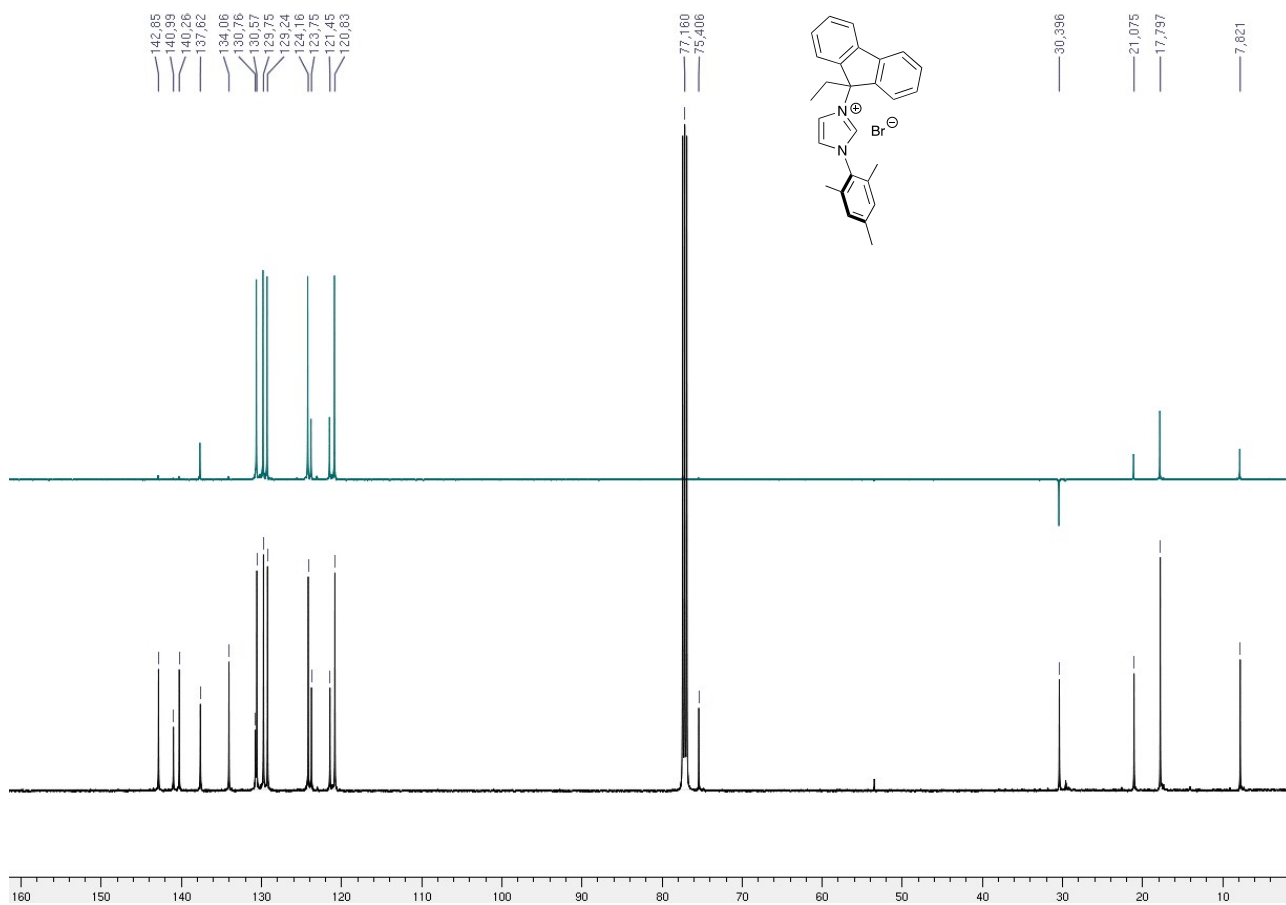

$^1\text{H}$  NMR ( $\text{CDCl}_3$ , 500 MHz) of imidazolium  $3^{\text{Et}}$

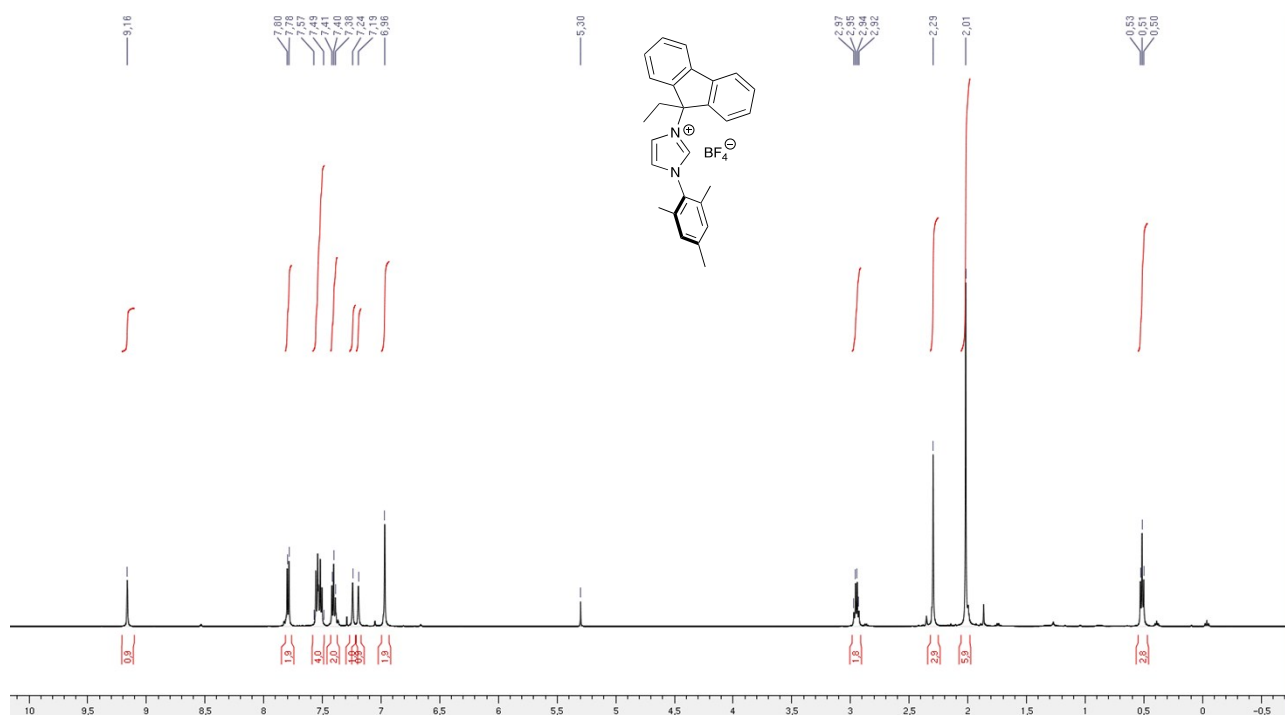

$^{13}\text{C}\{^1\text{H}\}$  and DEPT NMR ( $\text{CDCl}_3$ , 125 MHz) of imidazolium  $3^{\text{Et}}$

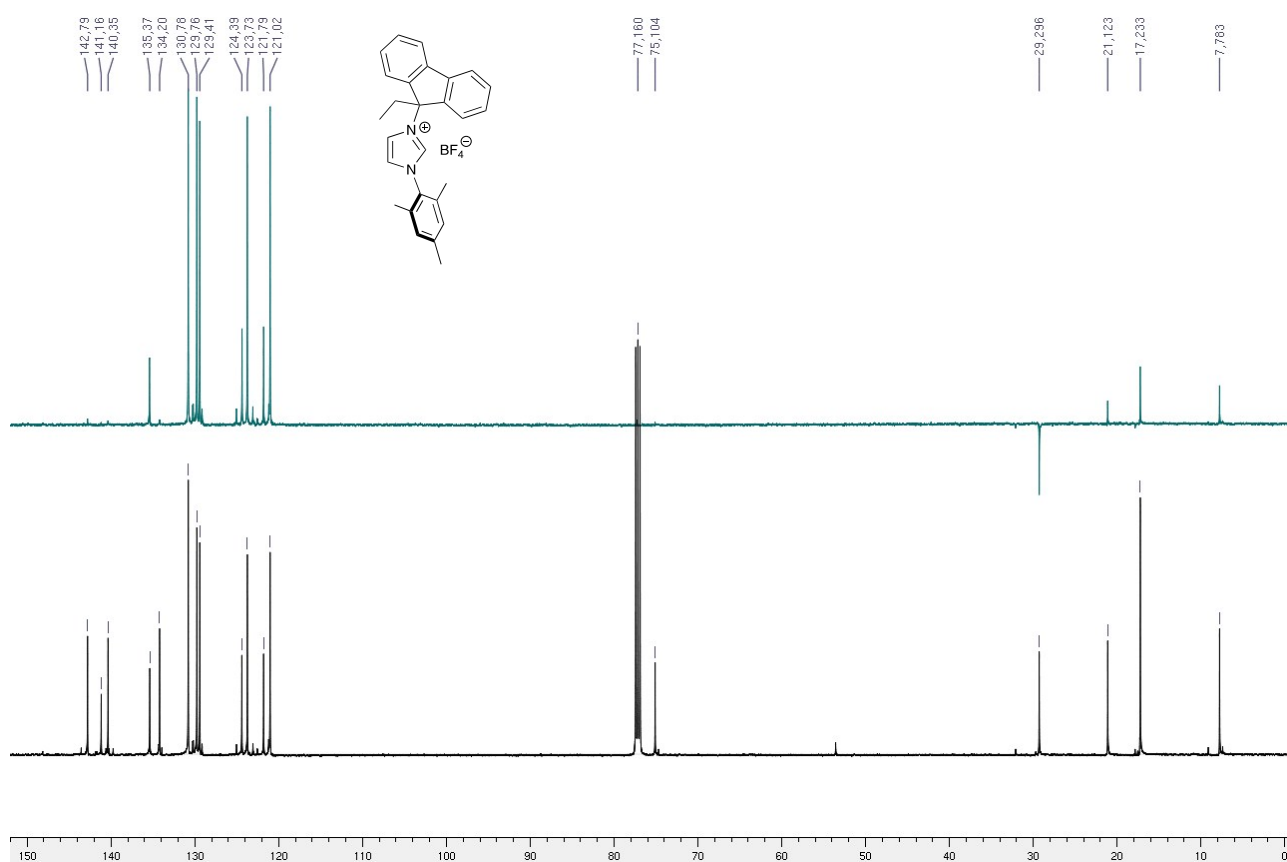

$^{19}\text{F}$  NMR ( $\text{CDCl}_3$ , 282 MHz) of imidazolium **3**<sup>Et</sup>

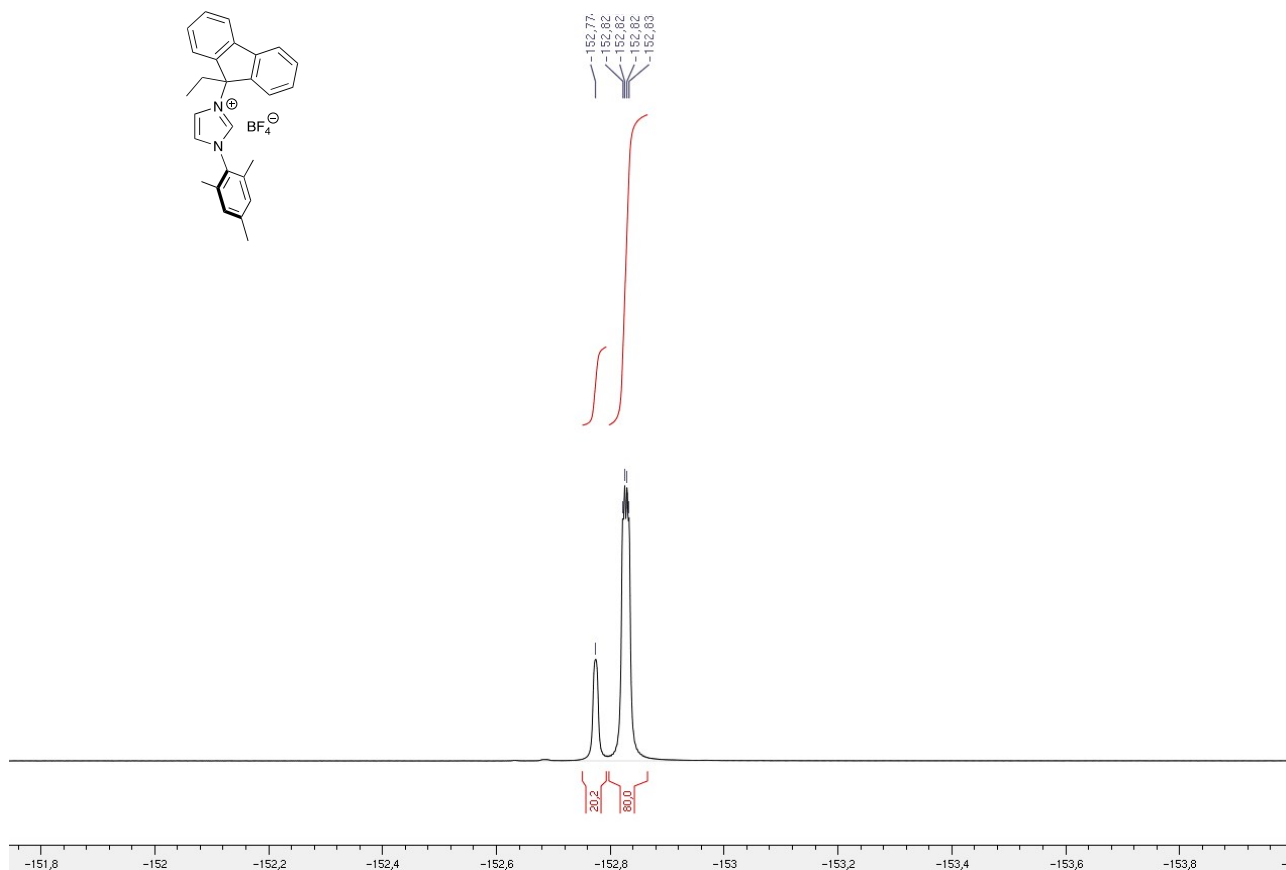

$^1\text{H}$  NMR ( $\text{CDCl}_3$ , 500 MHz) of imidazolium **4**<sup>\*Et</sup>

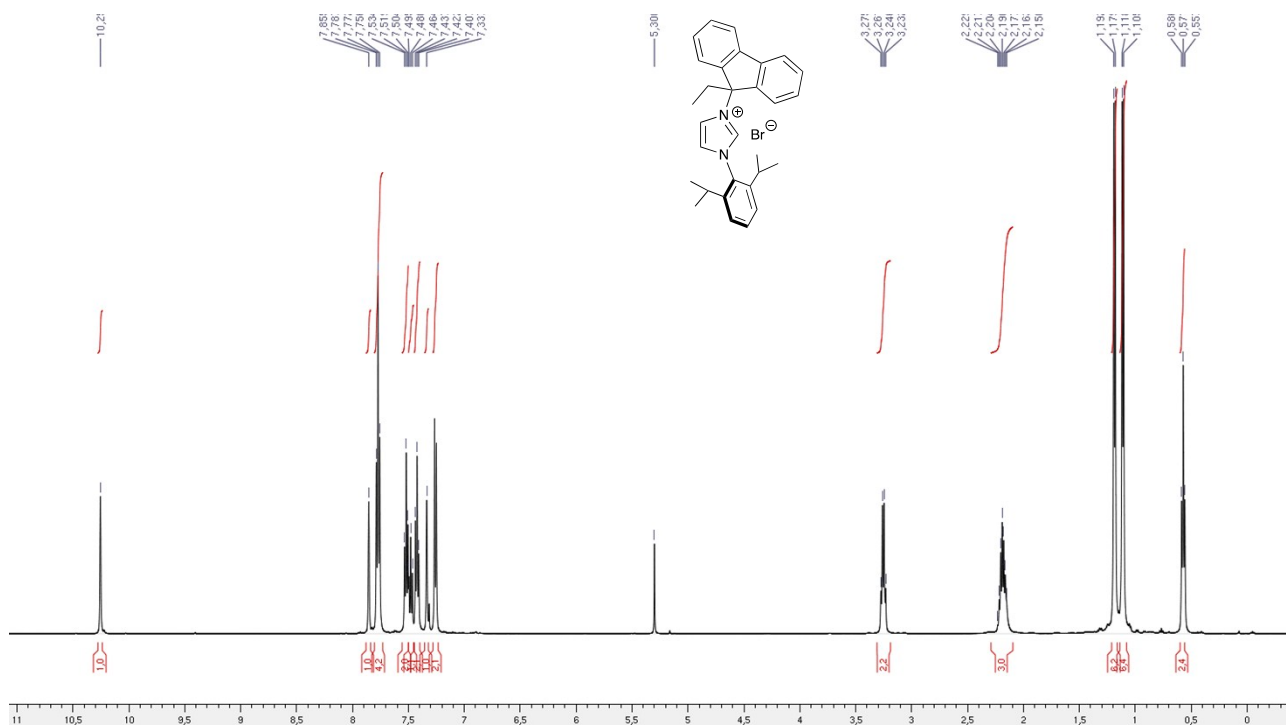

$^{13}\text{C}\{^1\text{H}\}$  and DEPT NMR ( $\text{CDCl}_3$ , 125 MHz) of imidazolium **4<sup>Et</sup>**

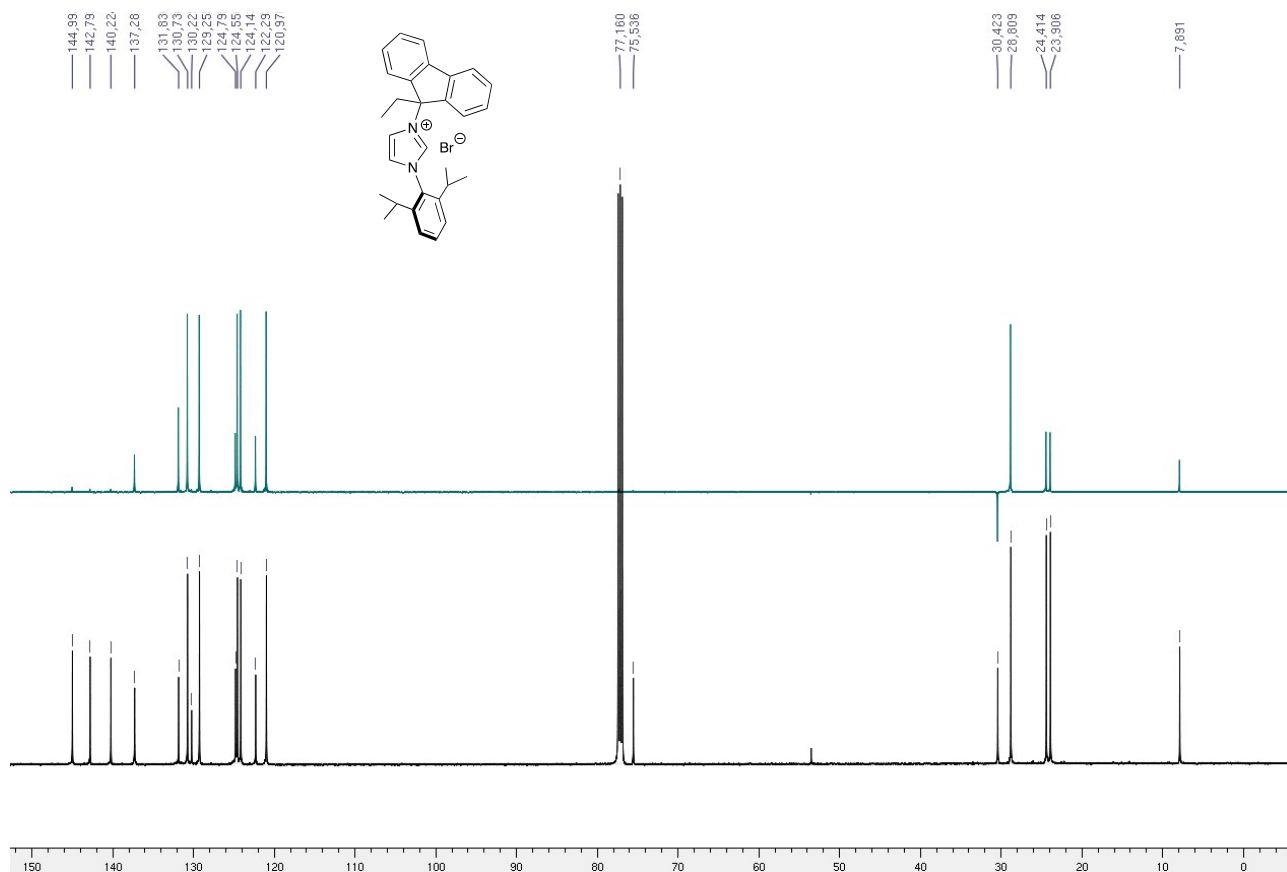

$^1\text{H}$  NMR ( $\text{CDCl}_3$ , 500 MHz) of imidazolium **4<sup>Et</sup>**

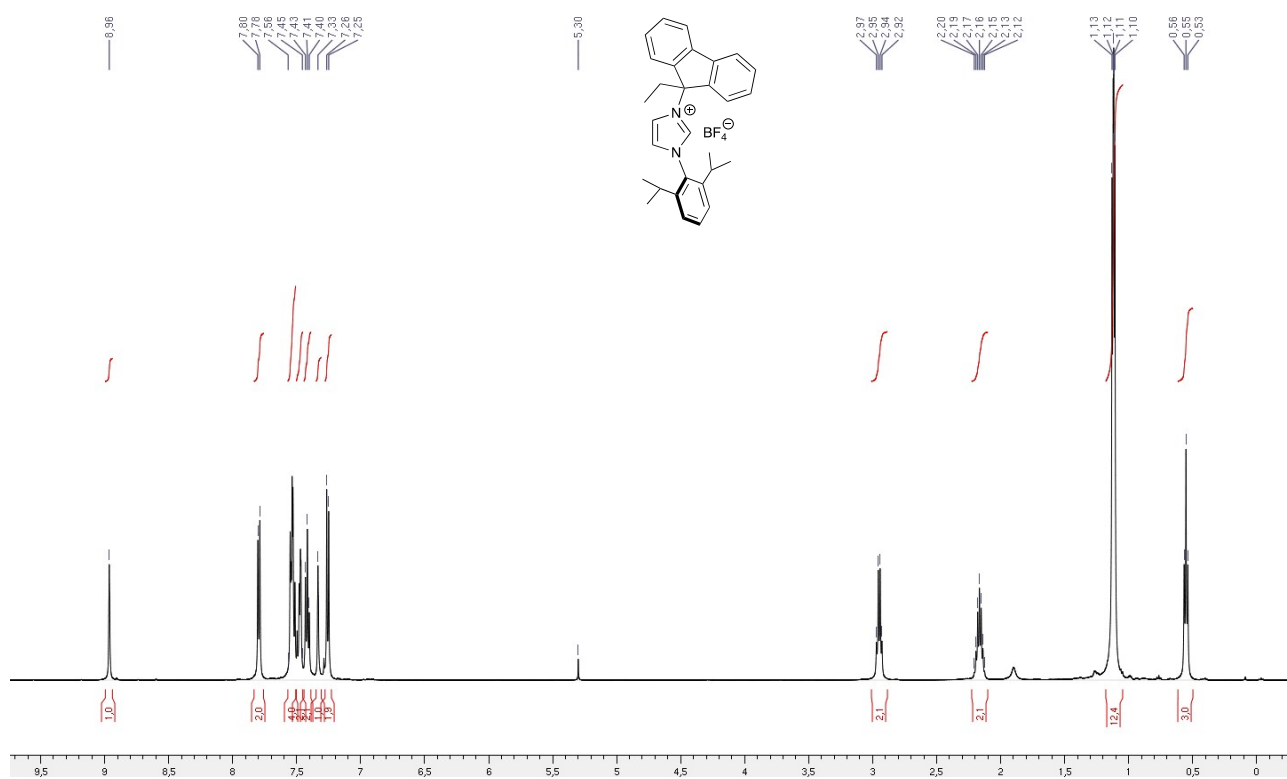

$^{13}\text{C}\{^1\text{H}\}$  and DEPT NMR ( $\text{CDCl}_3$ , 125 MHz) of imidazolium **4<sup>Et</sup>**

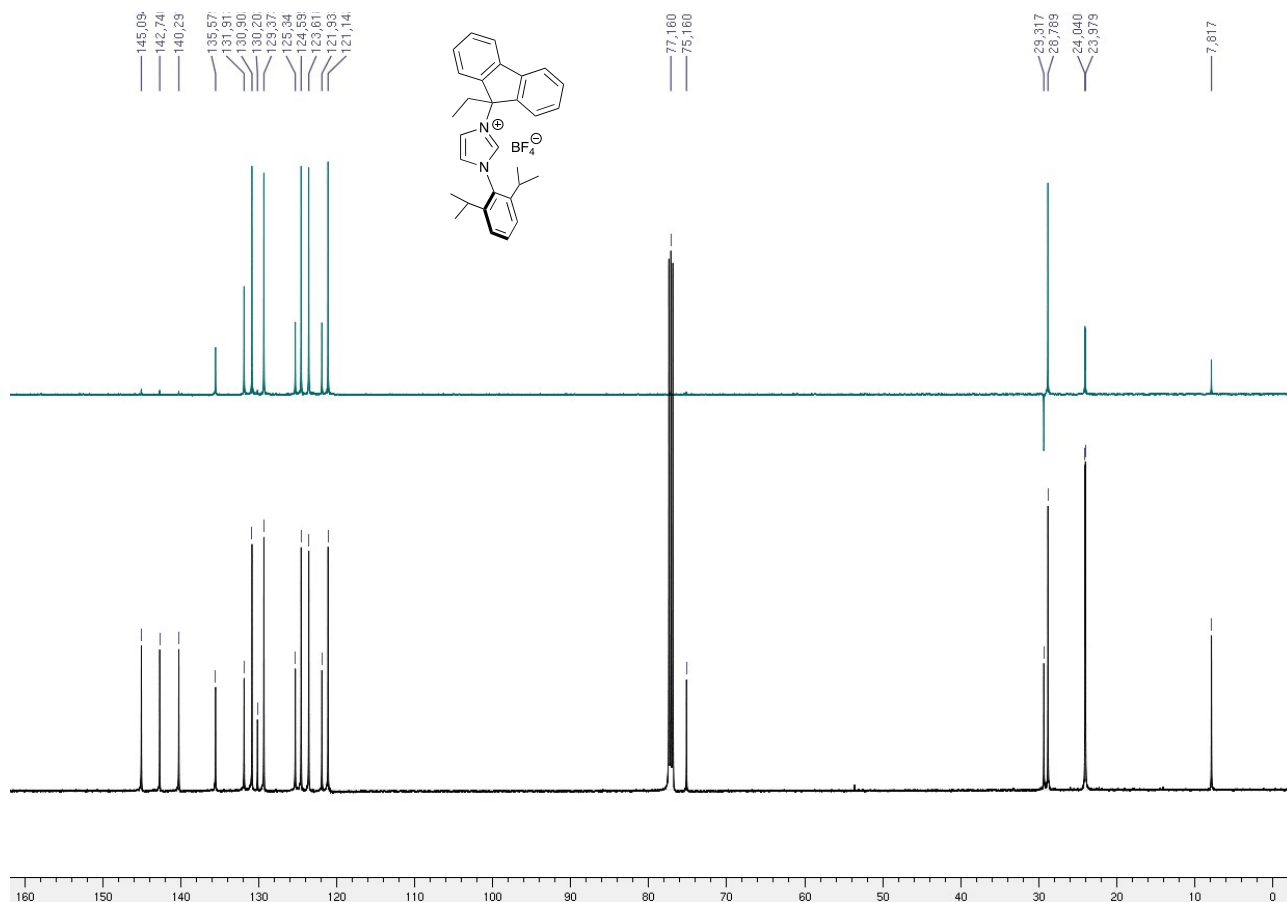

$^{19}\text{F}$  NMR ( $\text{CDCl}_3$ , 282 MHz) of imidazolium **4<sup>Et</sup>**

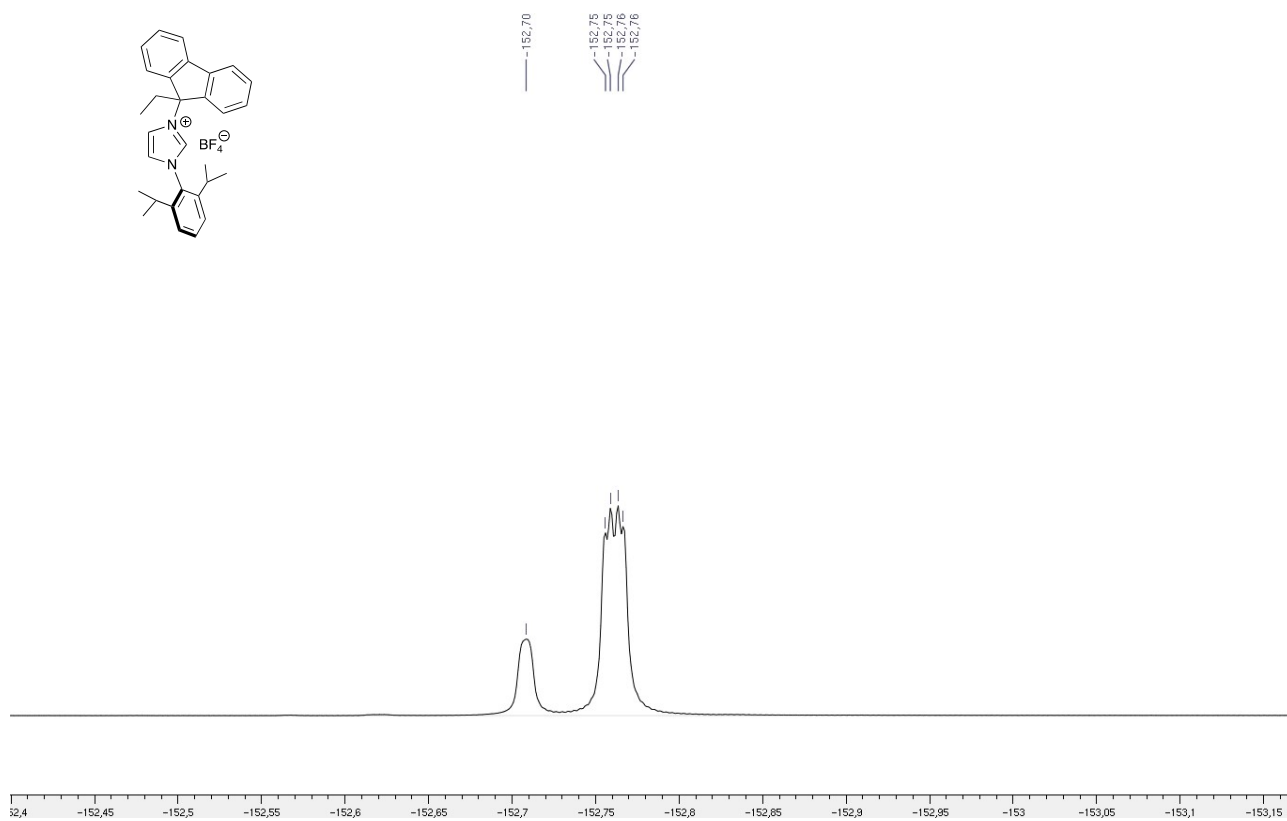



$^1\text{H}$  NMR ( $\text{CDCl}_3$ , 500 MHz) of imidazolium **3\*Pr**

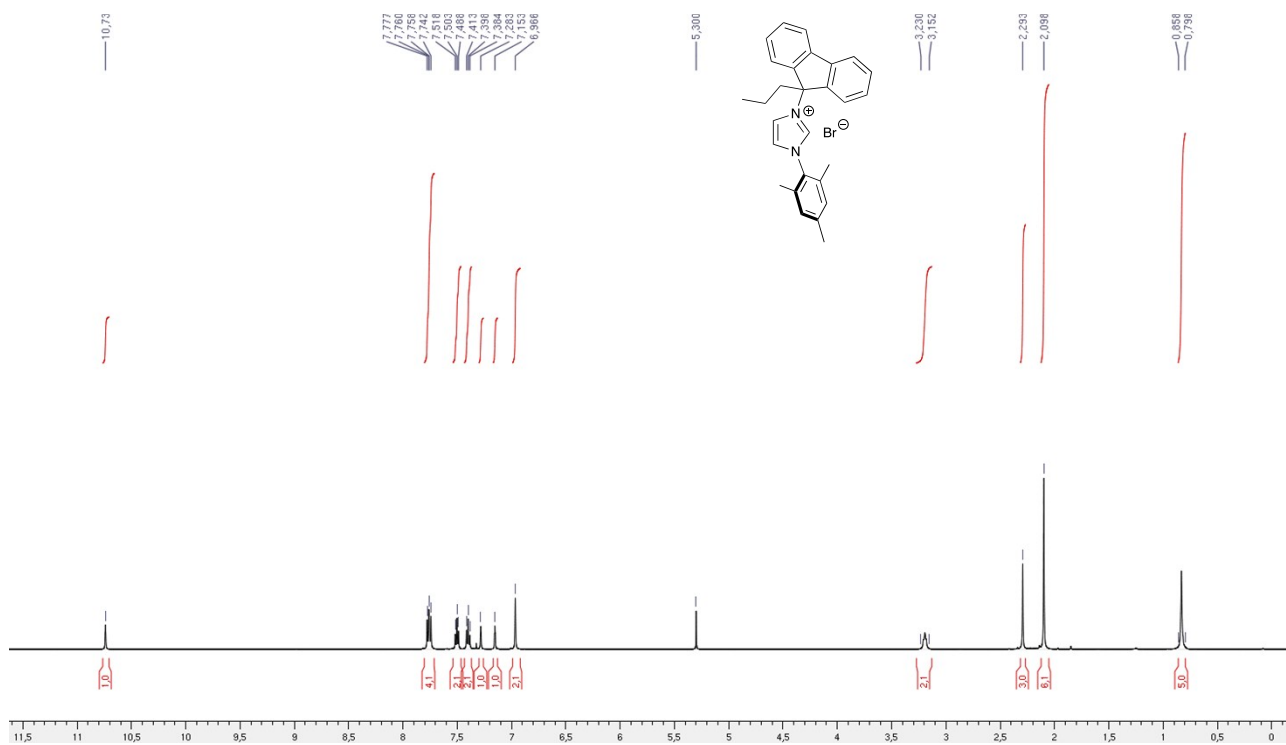

$^{13}\text{C}\{^1\text{H}\}$  and DEPT NMR ( $\text{CDCl}_3$ , 125 MHz) of imidazolium **3\*Pr**

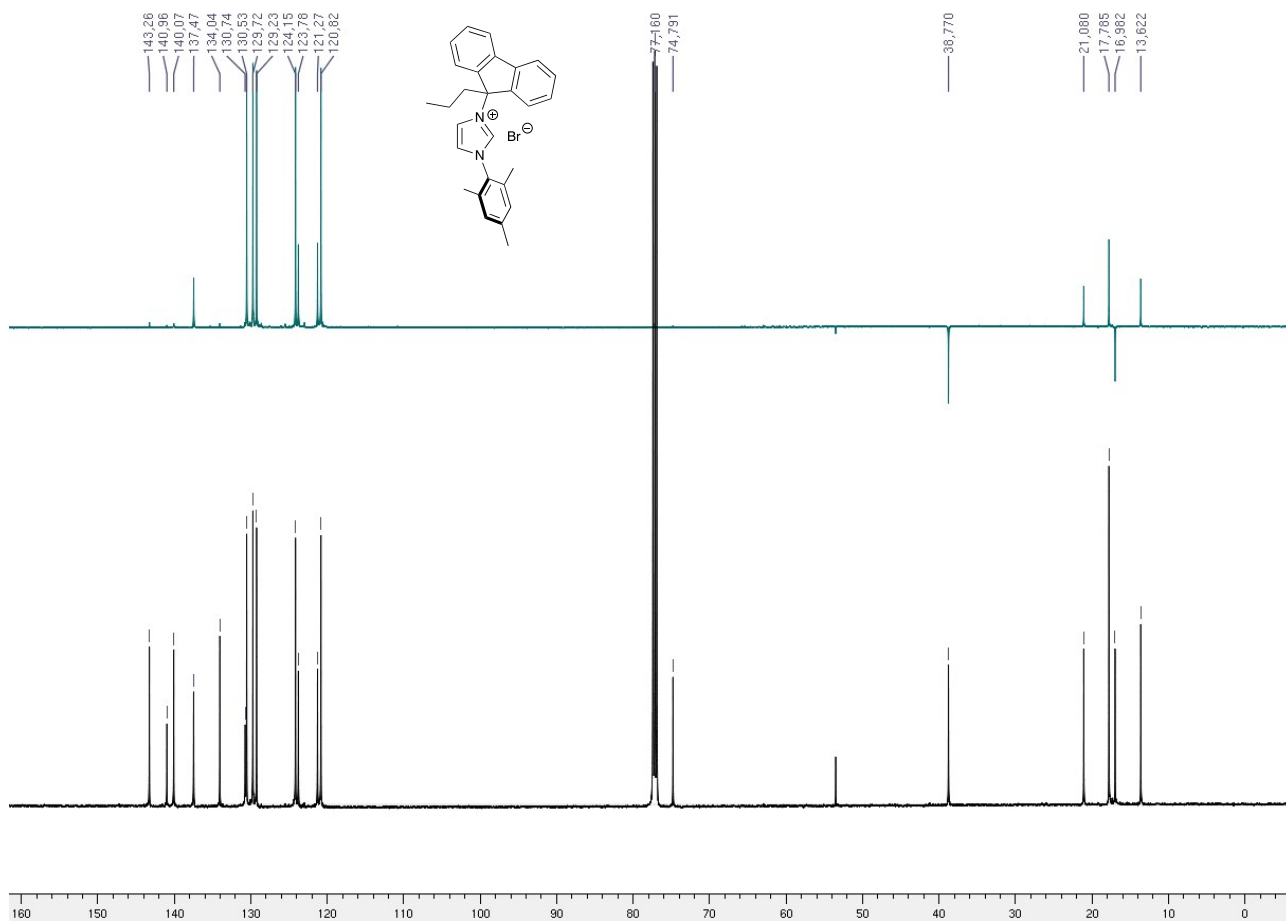

$^1\text{H}$  NMR ( $\text{CDCl}_3$ , 500 MHz) of imidazolium **3Pr**

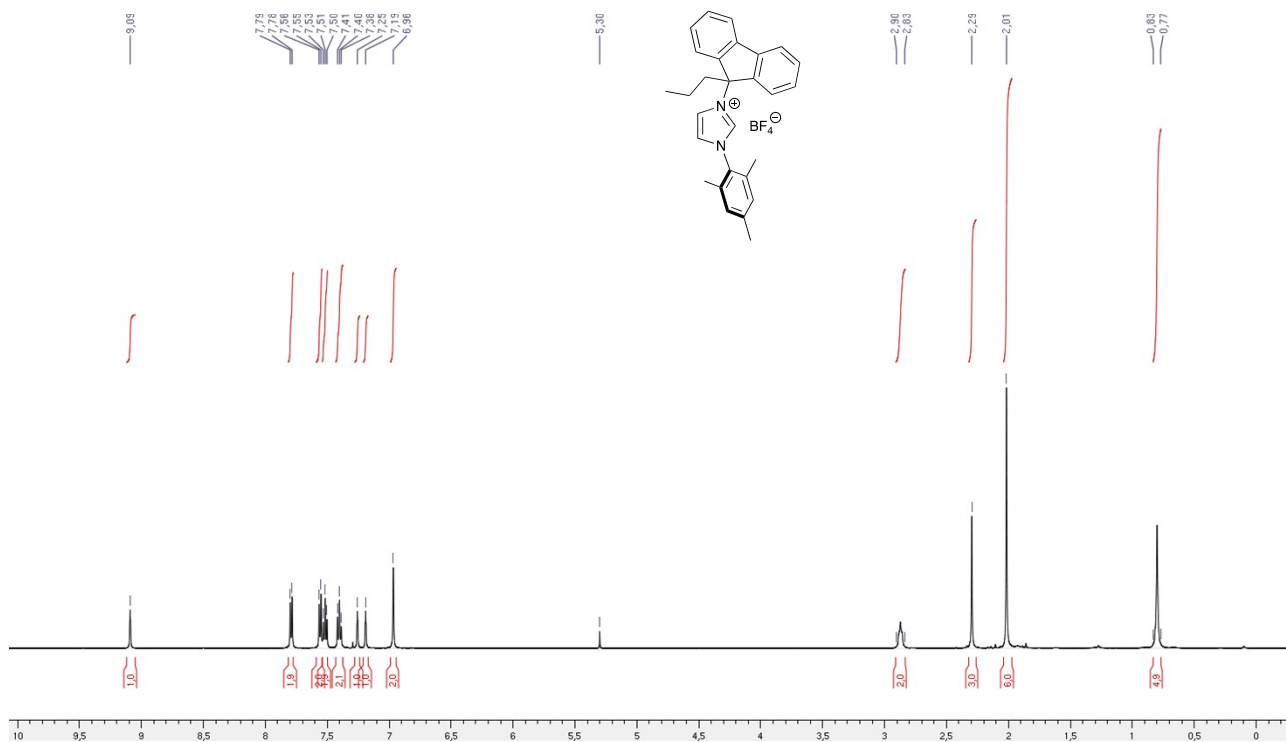

$^{13}\text{C}\{^1\text{H}\}$  and DEPT NMR ( $\text{CDCl}_3$ , 125 MHz) of imidazolium **3Pr**

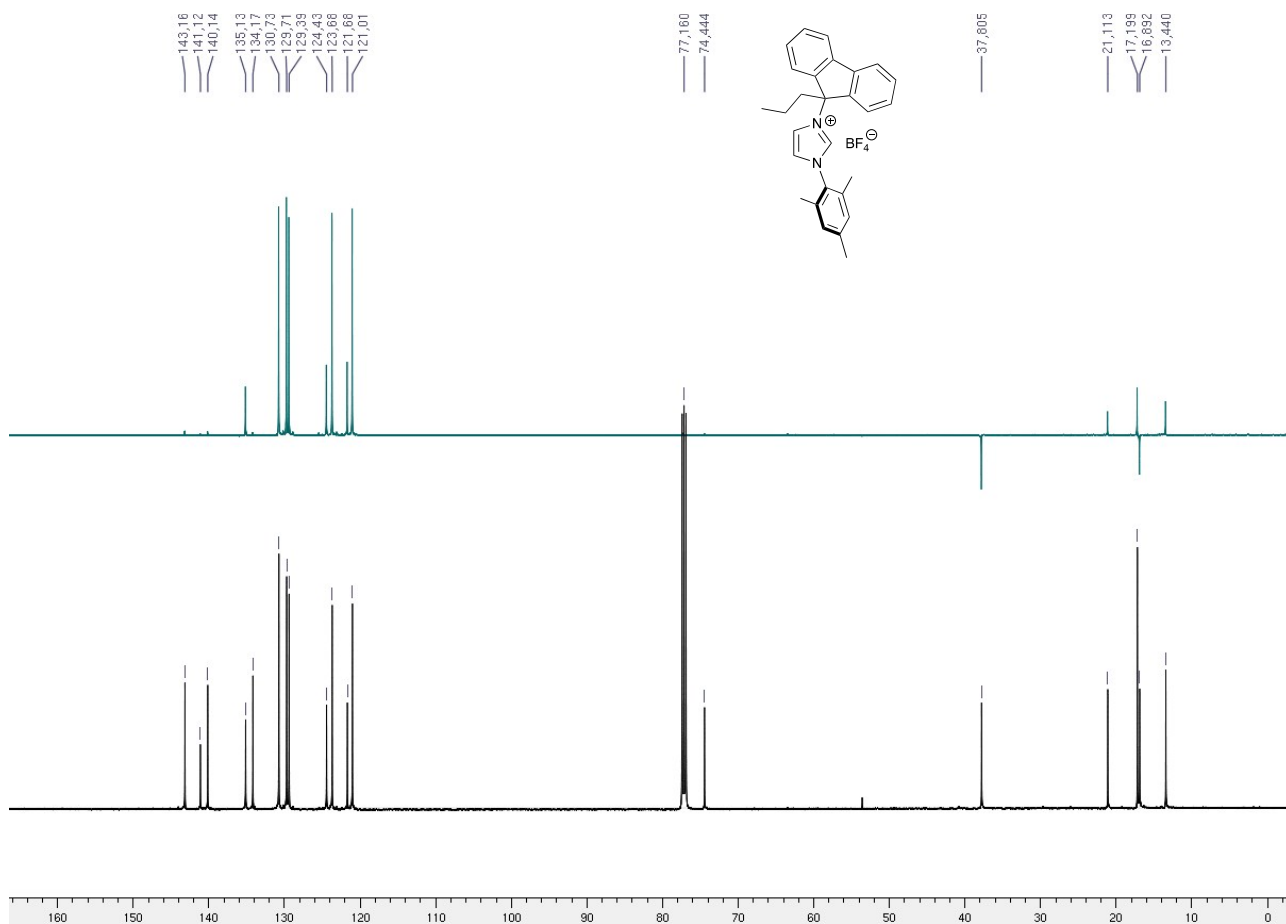

$^{19}\text{F}$  NMR ( $\text{CDCl}_3$ , 282 MHz) of imidazolium **3<sup>Pr</sup>**

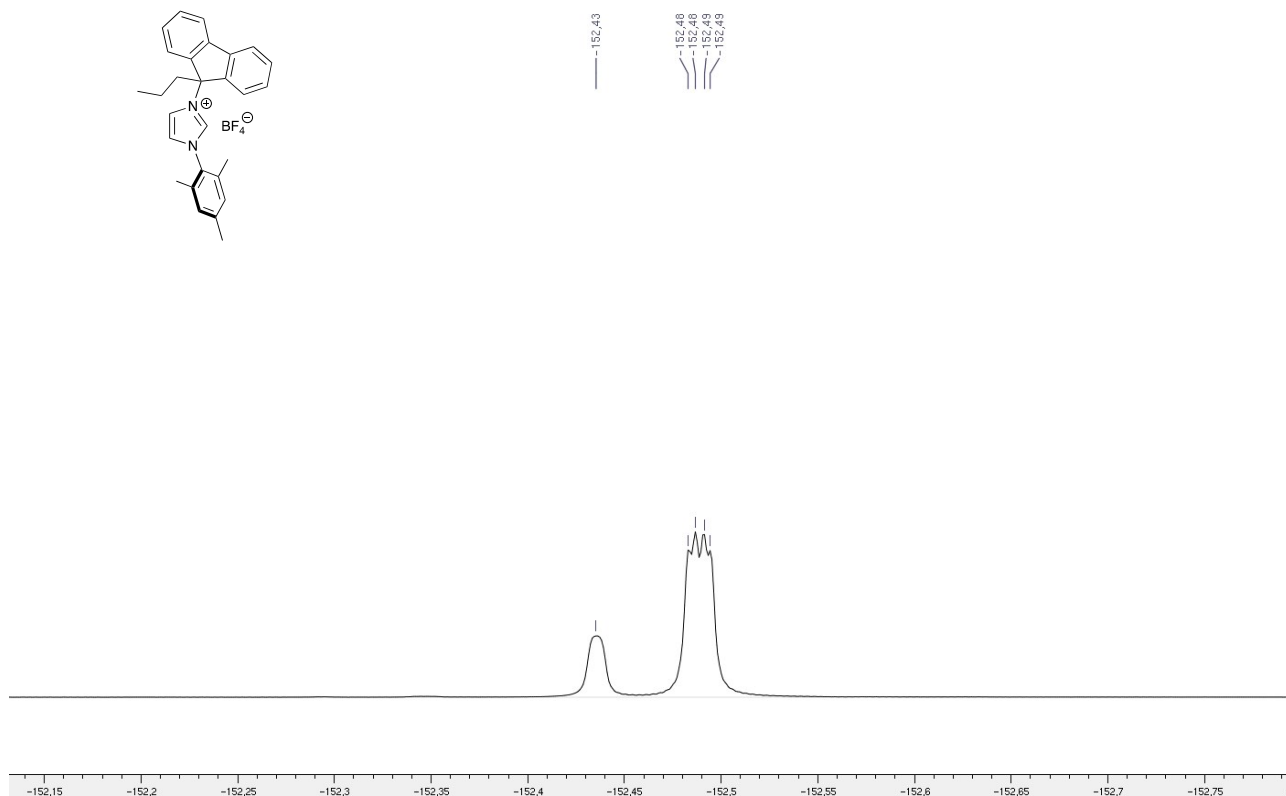

$^1\text{H}$  NMR ( $\text{CDCl}_3$ , 400 MHz) of imidazolium **4\*Pr**

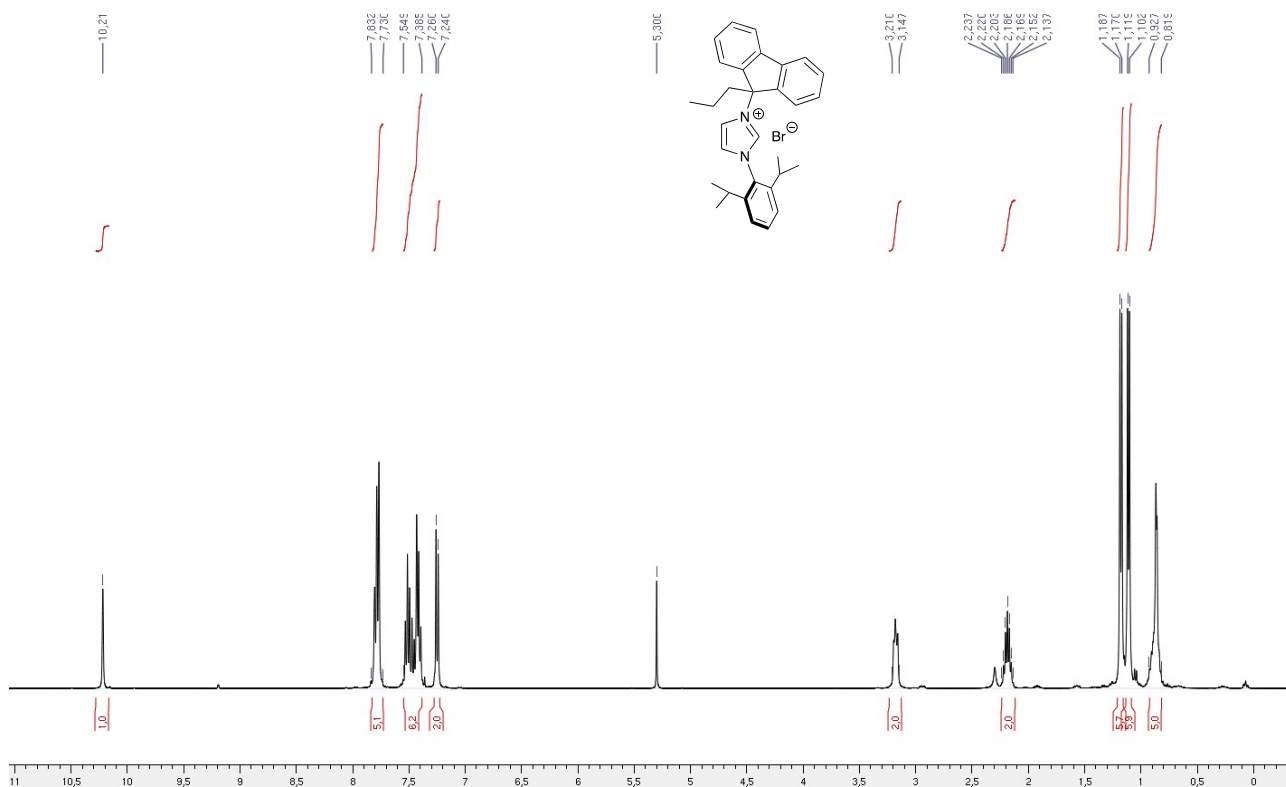

$^{13}\text{C}\{^1\text{H}\}$  and DEPT NMR ( $\text{CDCl}_3$ , 125 MHz) of imidazolium **4<sup>Pr</sup>**

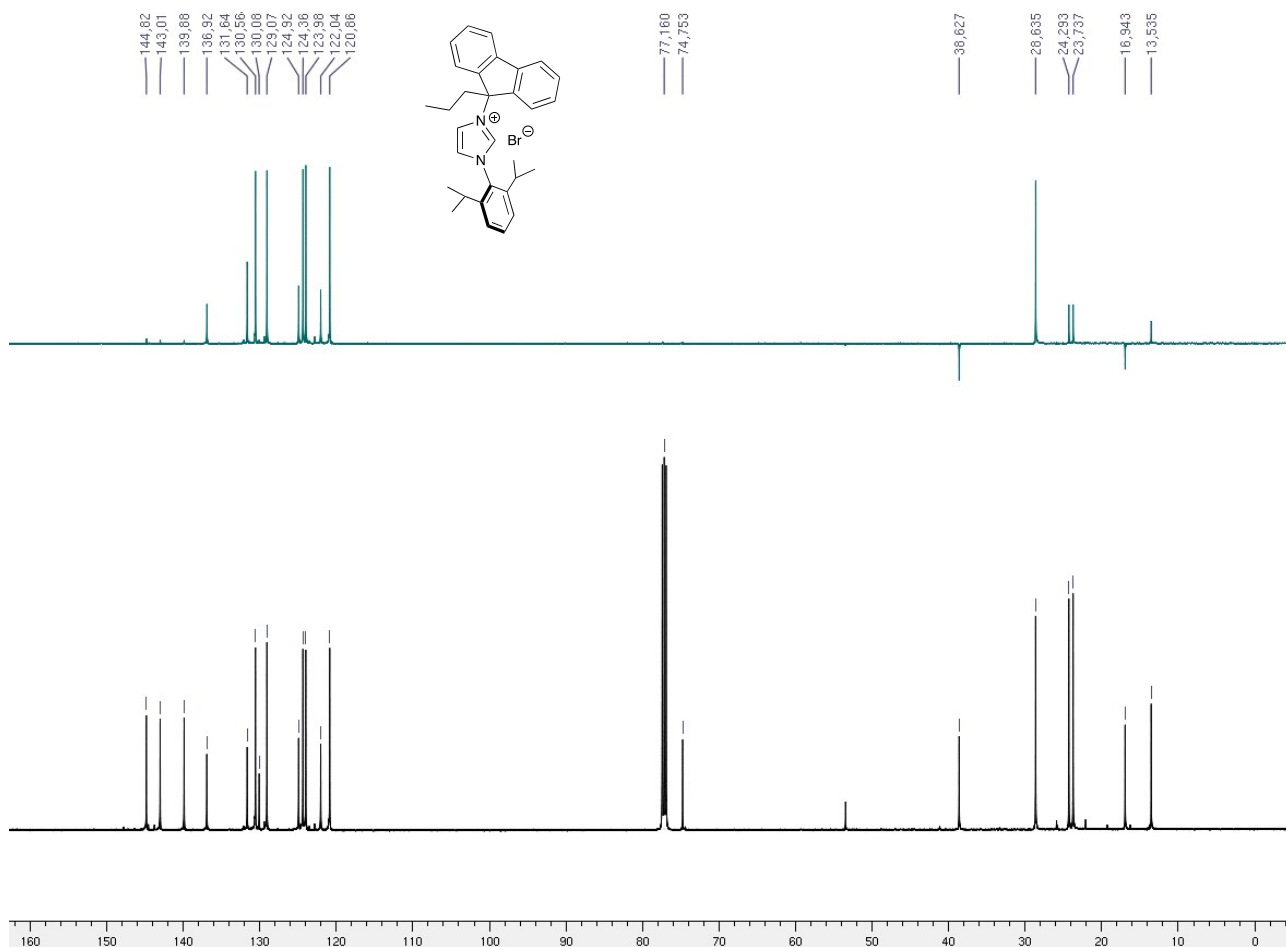

$^1\text{H}$  NMR ( $\text{CDCl}_3$ , 500 MHz) of imidazolium **4<sup>Pr</sup>**

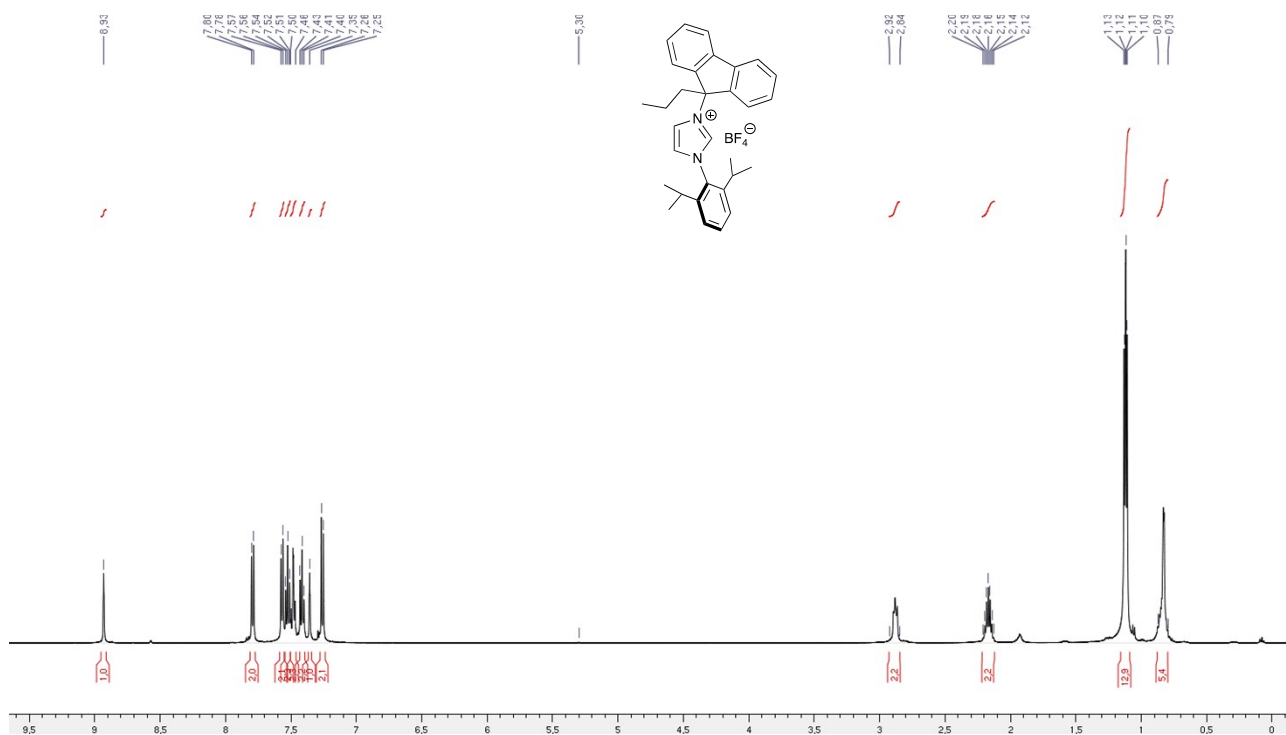

$^{13}\text{C}\{^1\text{H}\}$  and DEPT NMR ( $\text{CDCl}_3$ , 125 MHz) of imidazolium **4Pr**

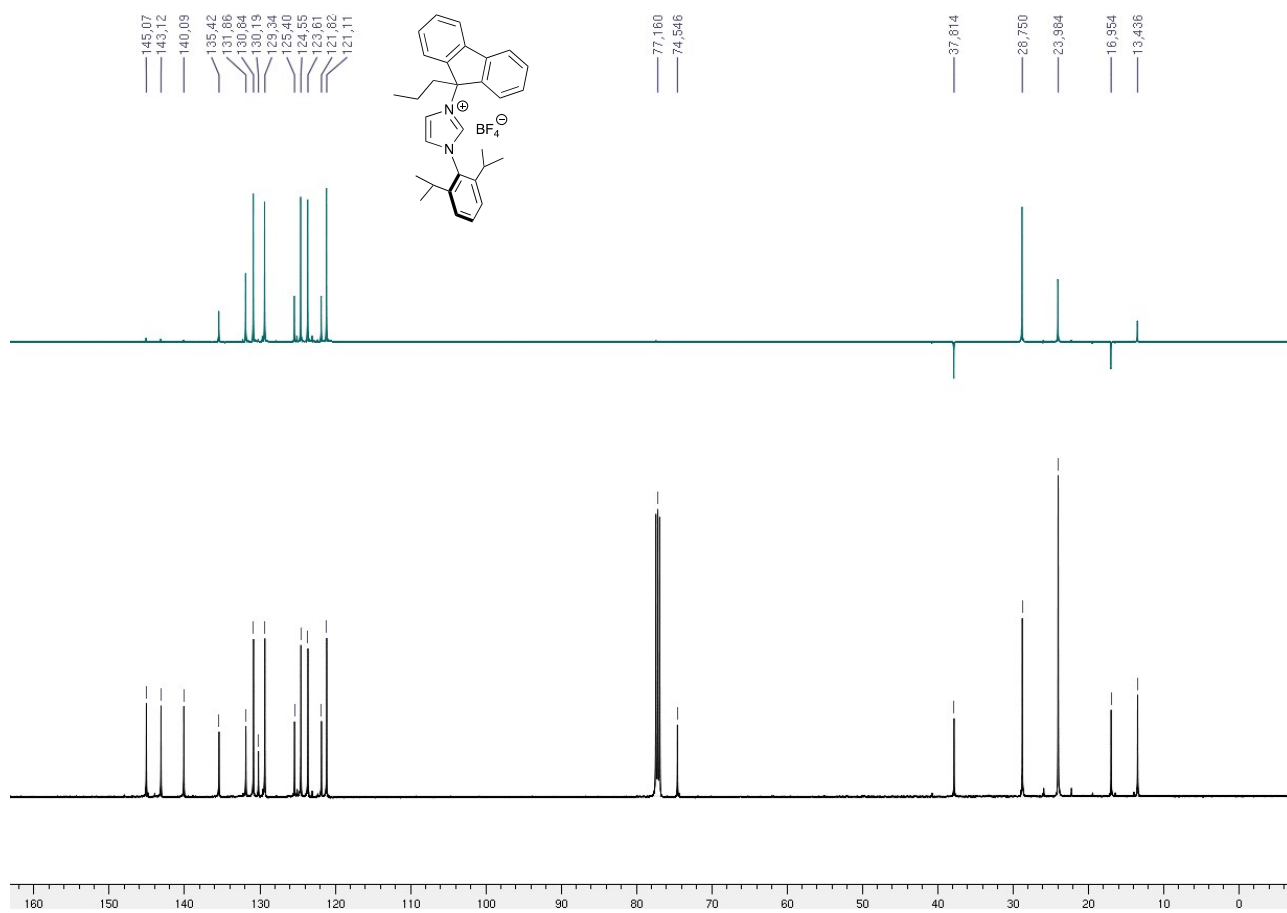

$^{19}\text{F}$  NMR ( $\text{CDCl}_3$ , 282 MHz) of imidazolium **4Pr**

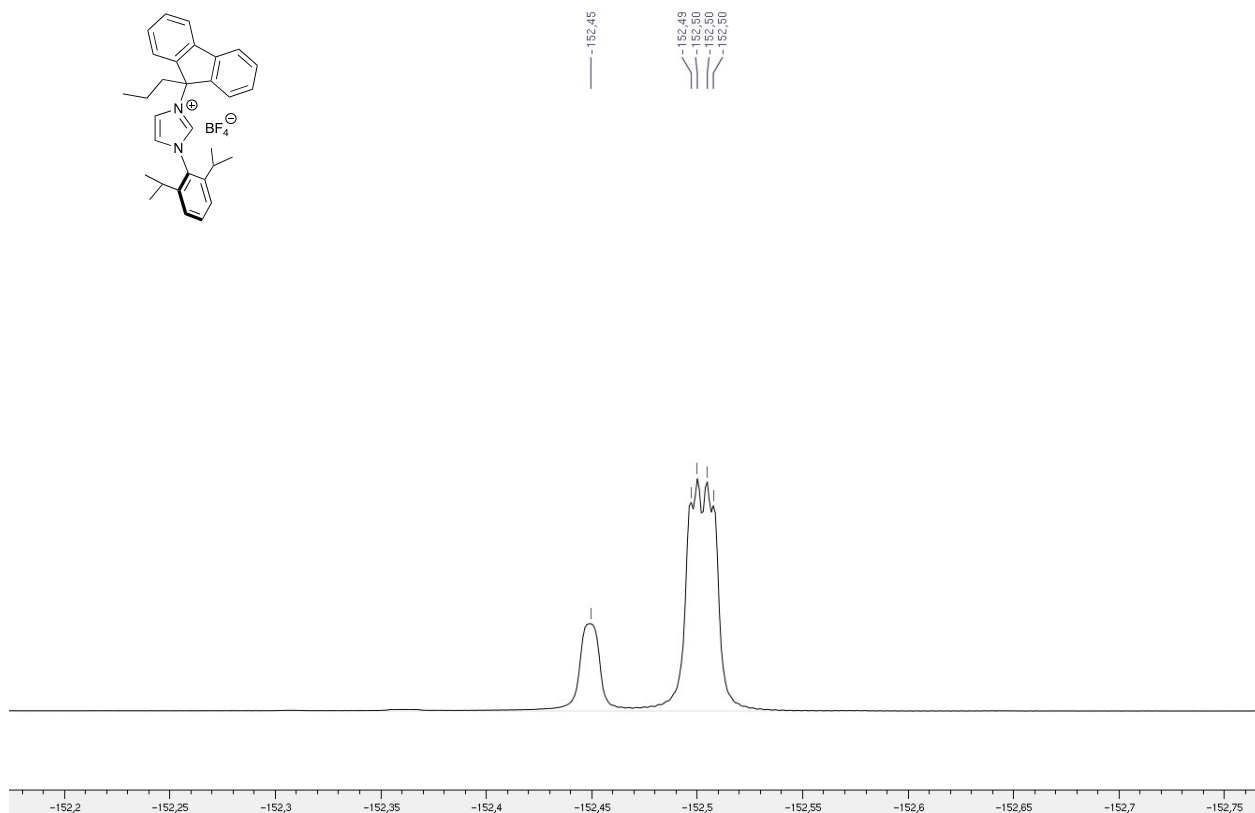

$^1\text{H}$  NMR ( $\text{CDCl}_3$ , 500 MHz) of imidazolium **3**<sup>EOM</sup>

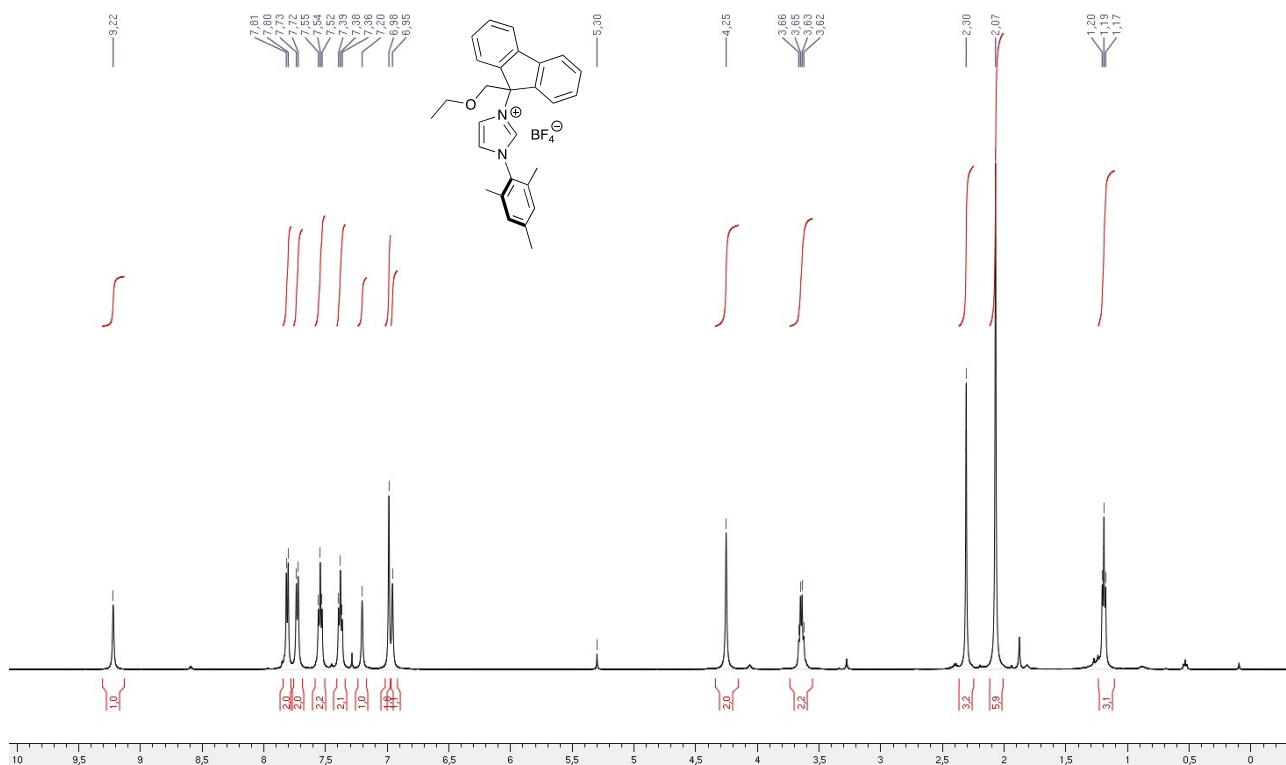

$^{13}\text{C}\{^1\text{H}\}$  and DEPT NMR ( $\text{CDCl}_3$ , 125 MHz) of imidazolium **3**<sup>EOM</sup>

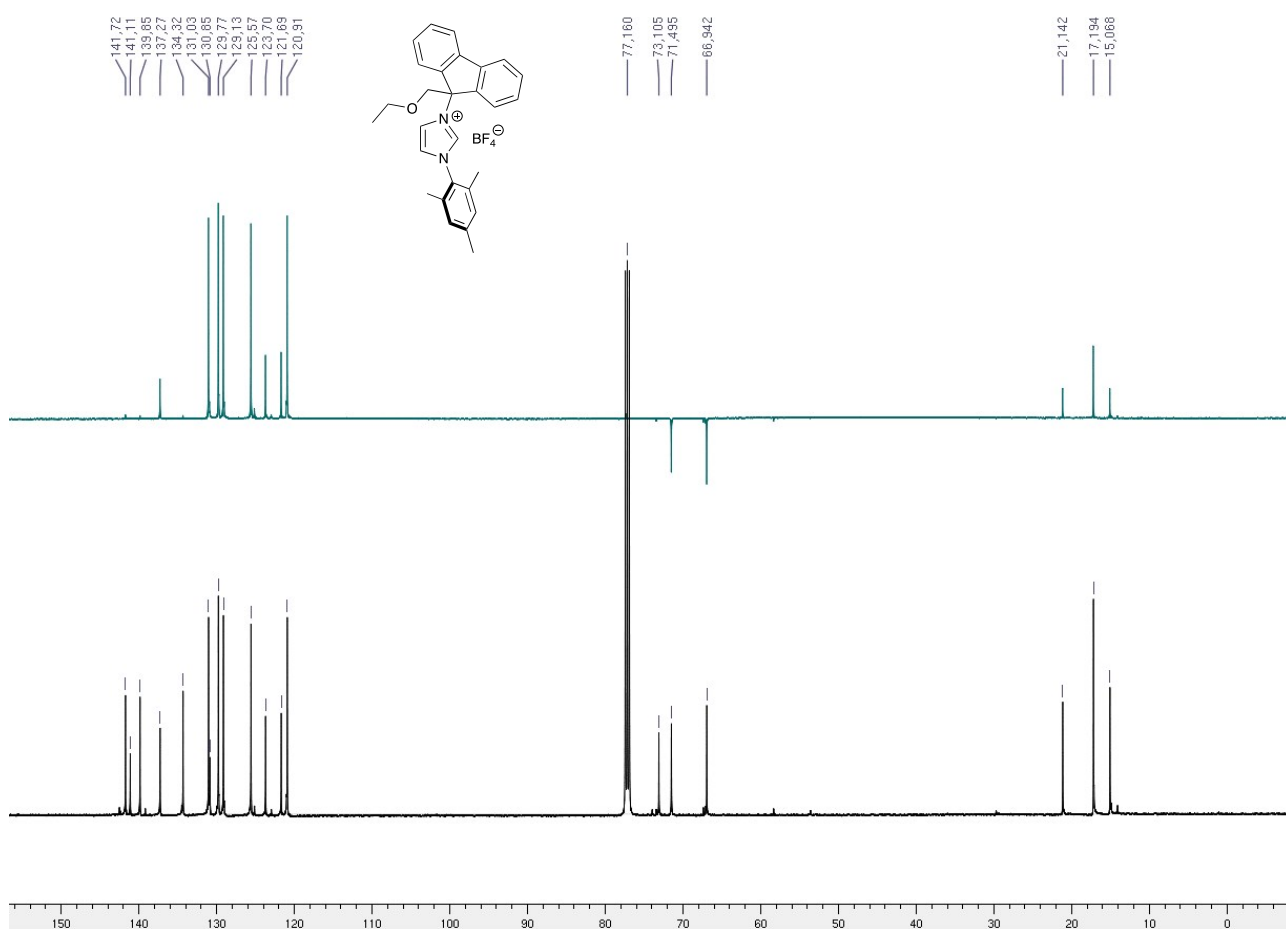

$^{19}\text{F}$  NMR ( $\text{CDCl}_3$ , 282 MHz) of imidazolium **3**<sup>EOM</sup>

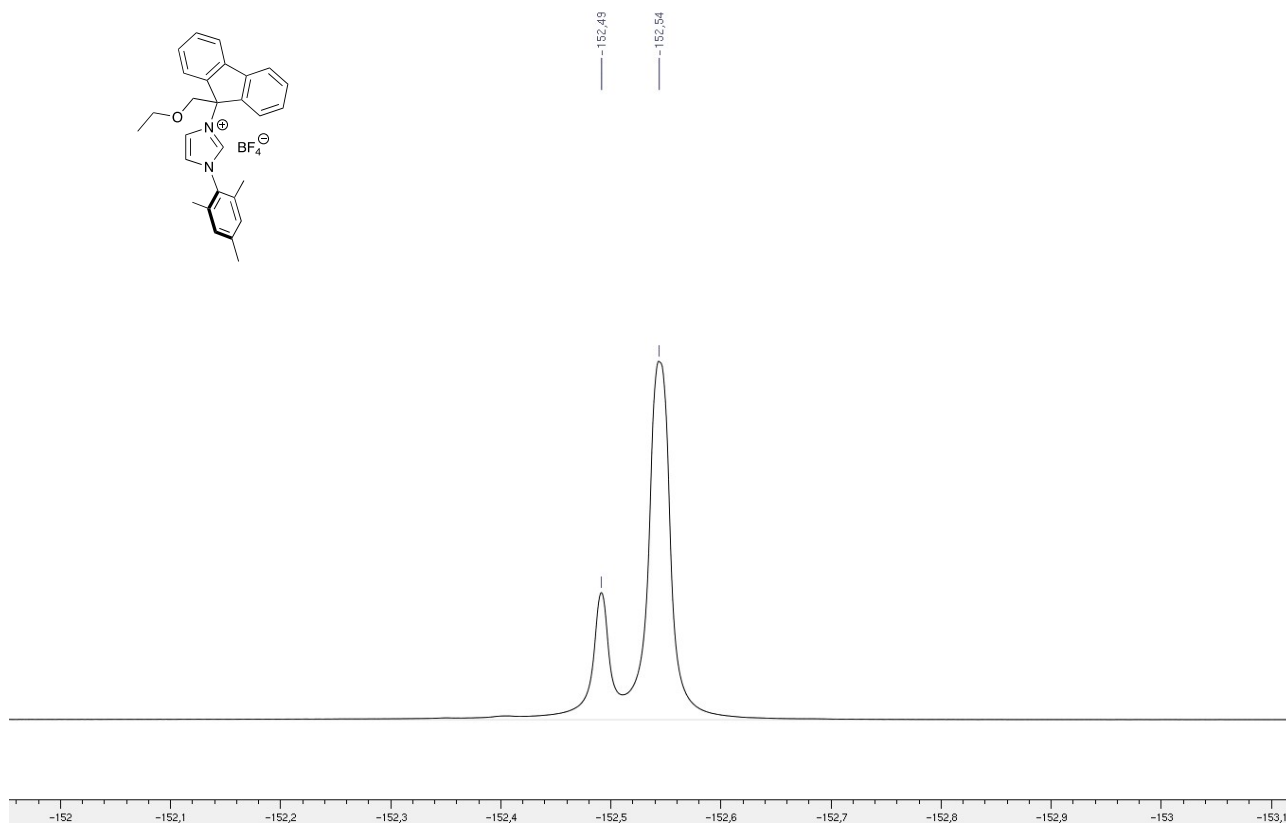

$^1\text{H}$  NMR ( $\text{CDCl}_3$ , 500 MHz) of imidazolium **4**<sup>EOM</sup>

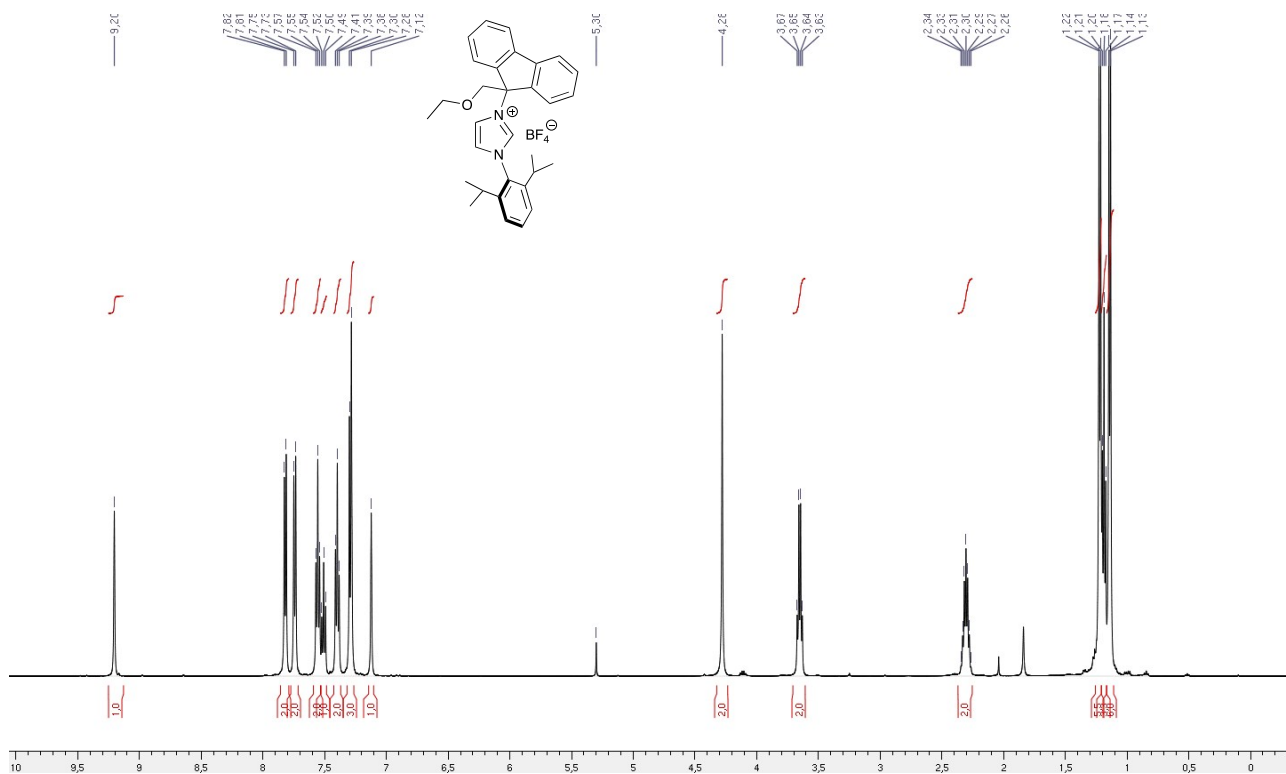

$^{13}\text{C}\{^1\text{H}\}$  and DEPT NMR ( $\text{CDCl}_3$ , 125 MHz) of imidazolium **4**<sup>EOM</sup>

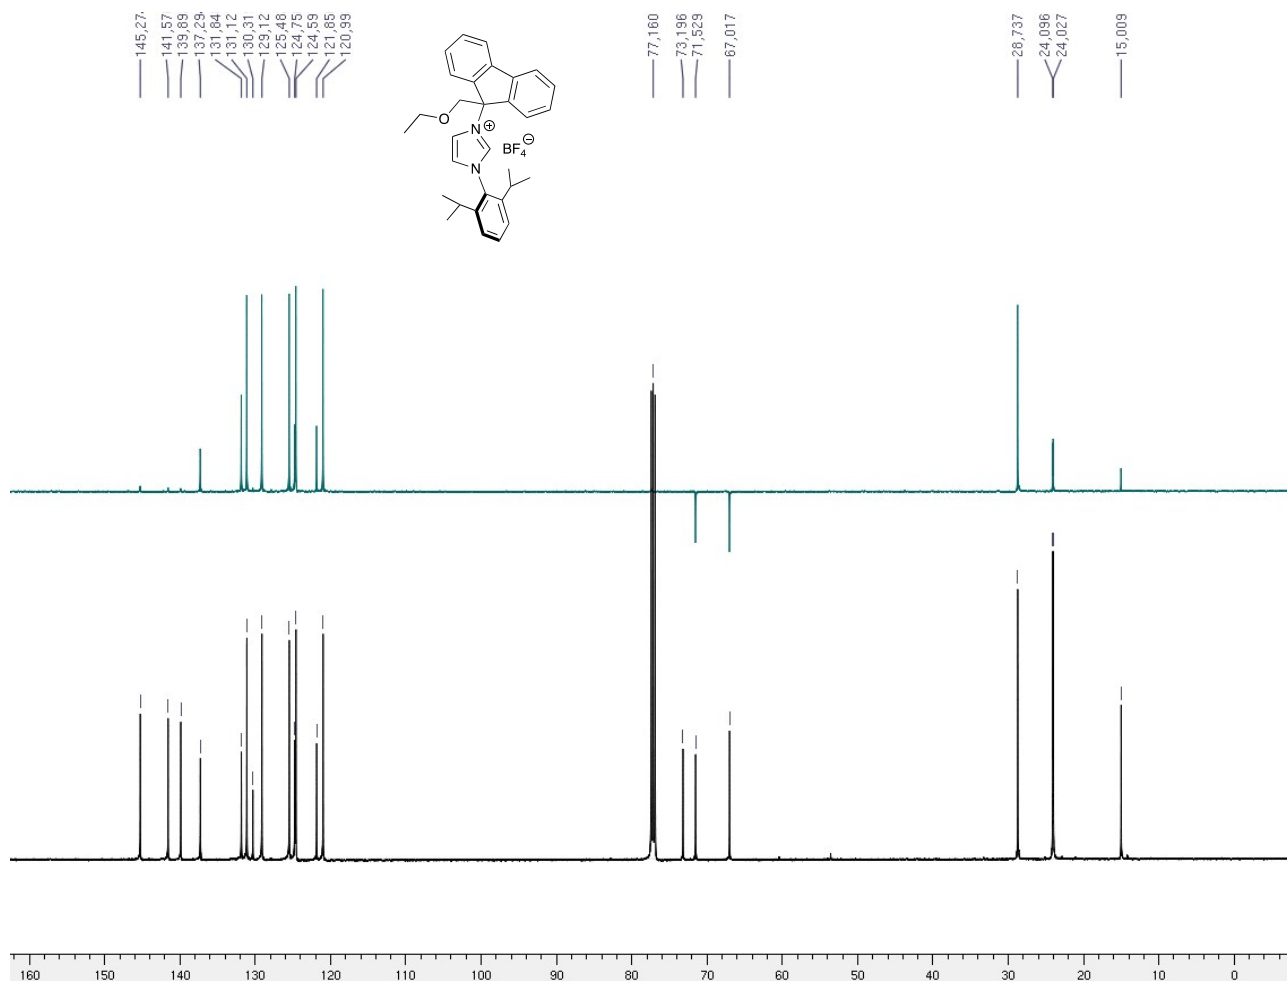

$^{19}\text{F}$  NMR ( $\text{CDCl}_3$ , 282 MHz) of imidazolium **4**<sup>EOM</sup>

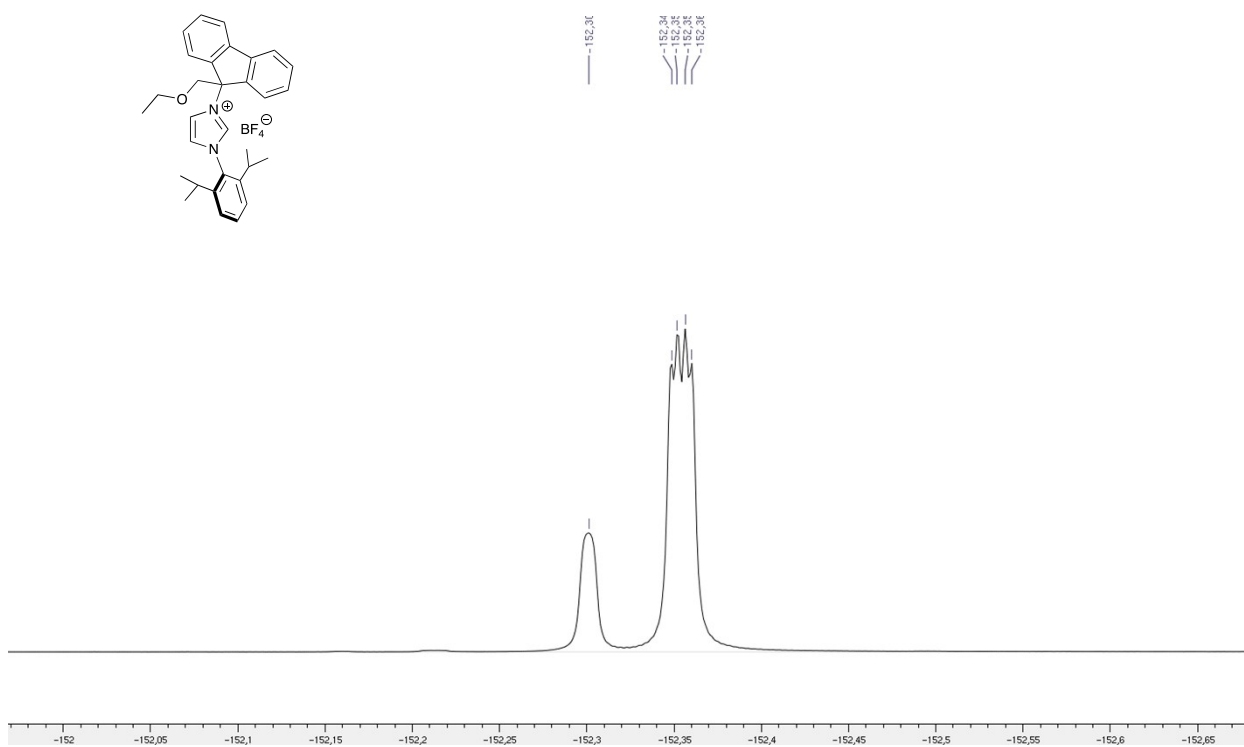



$^1\text{H}$  NMR ( $\text{CDCl}_3$ , 500 MHz) of complex  $5^{\text{Et}}$

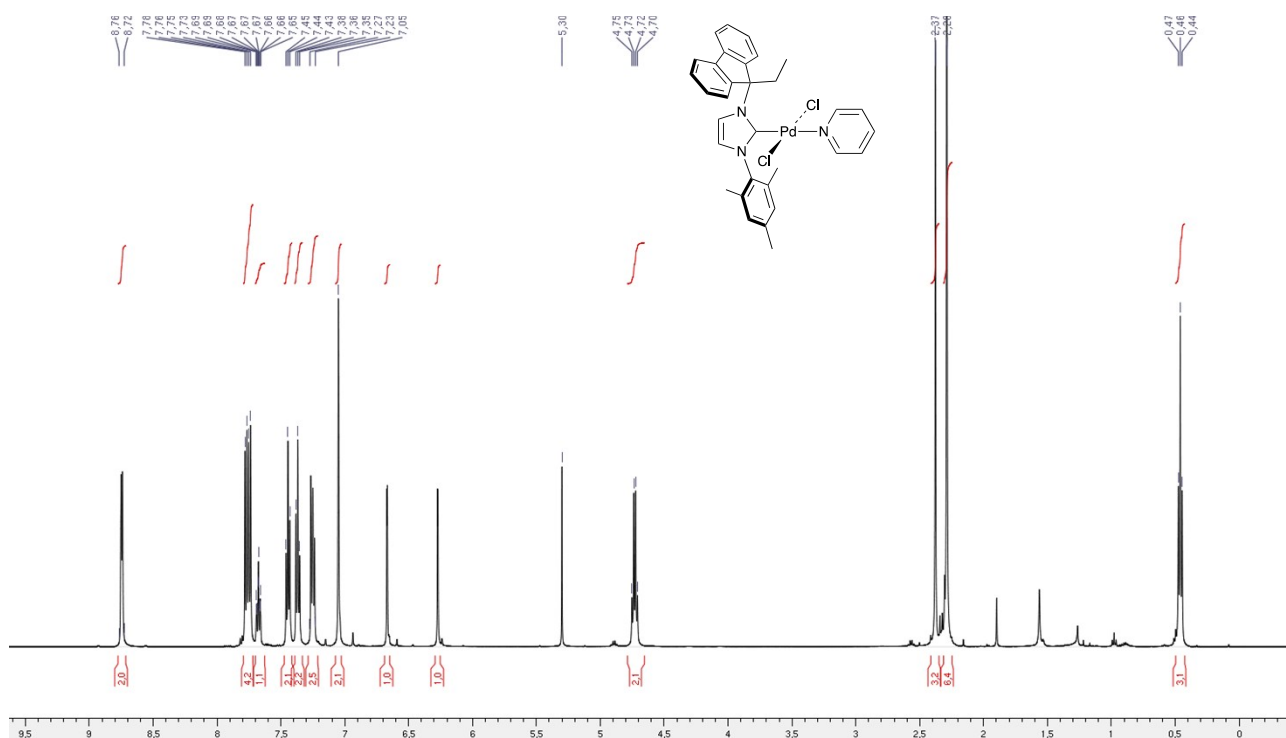

$^{13}\text{C}\{^1\text{H}\}$  and DEPT NMR ( $\text{CDCl}_3$ , 125 MHz) of complex  $5^{\text{Et}}$

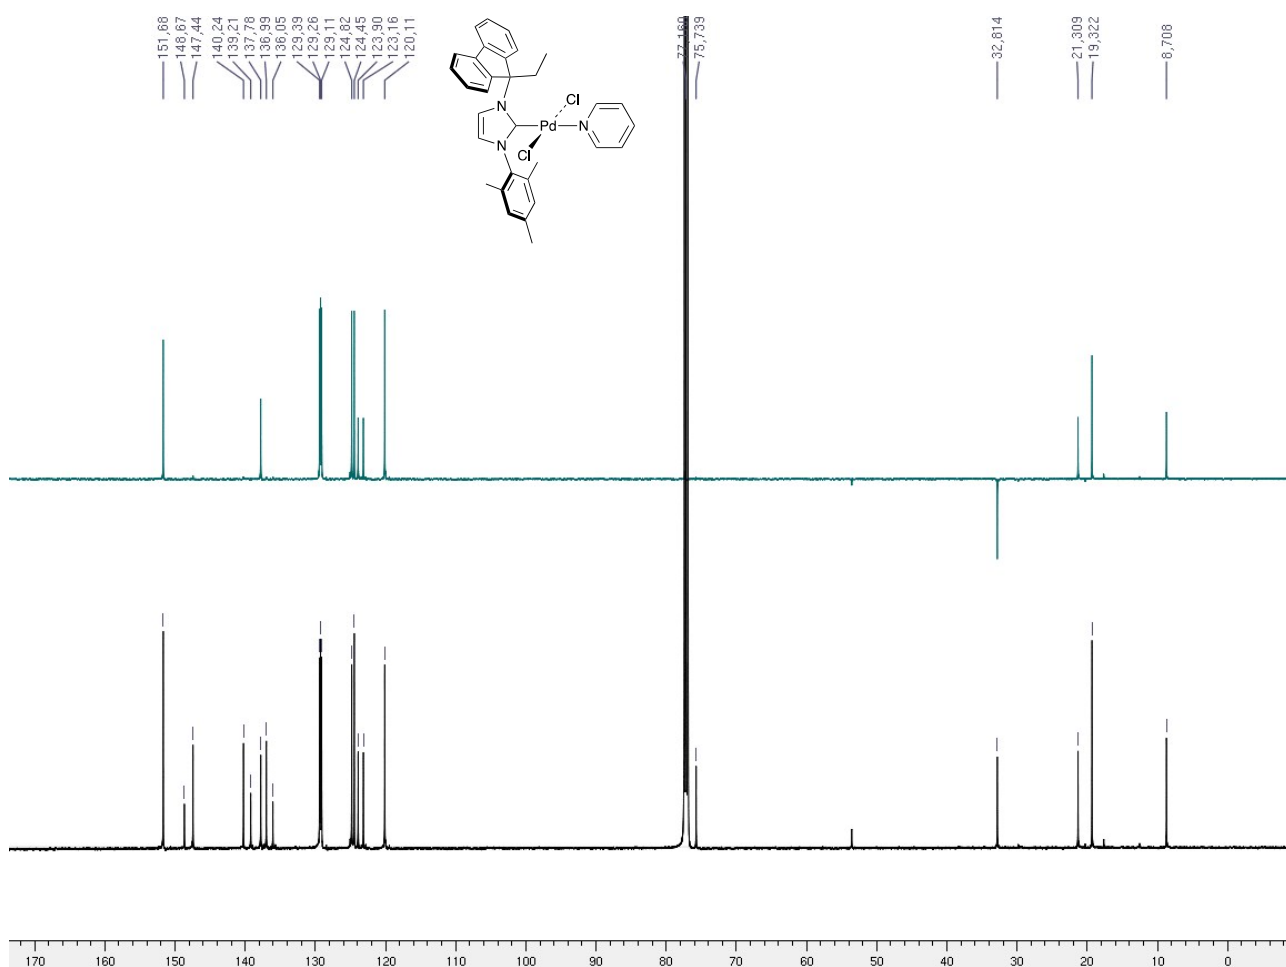

$^1\text{H}$  NMR ( $\text{CDCl}_3$ , 500 MHz) of complex **6<sup>Et</sup>**

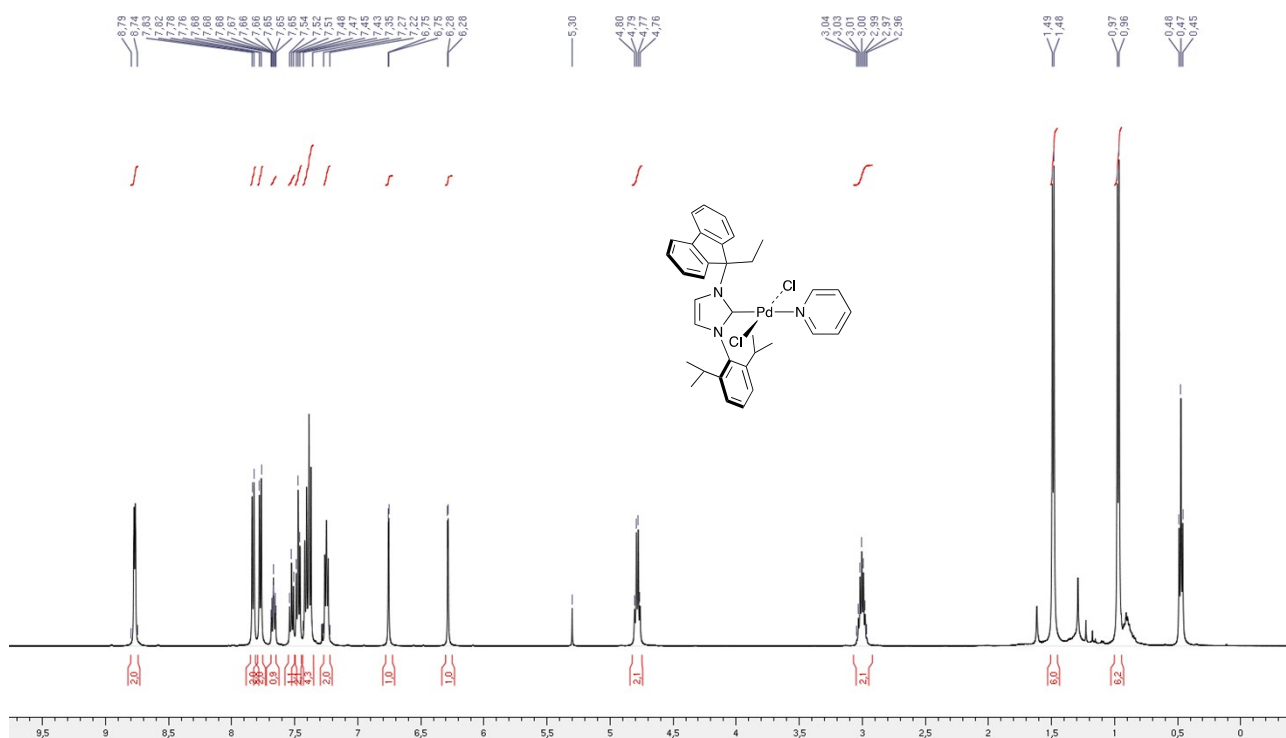

$^{13}\text{C}\{^1\text{H}\}$  and DEPT NMR ( $\text{CDCl}_3$ , 125 MHz) of complex **6<sup>Et</sup>**

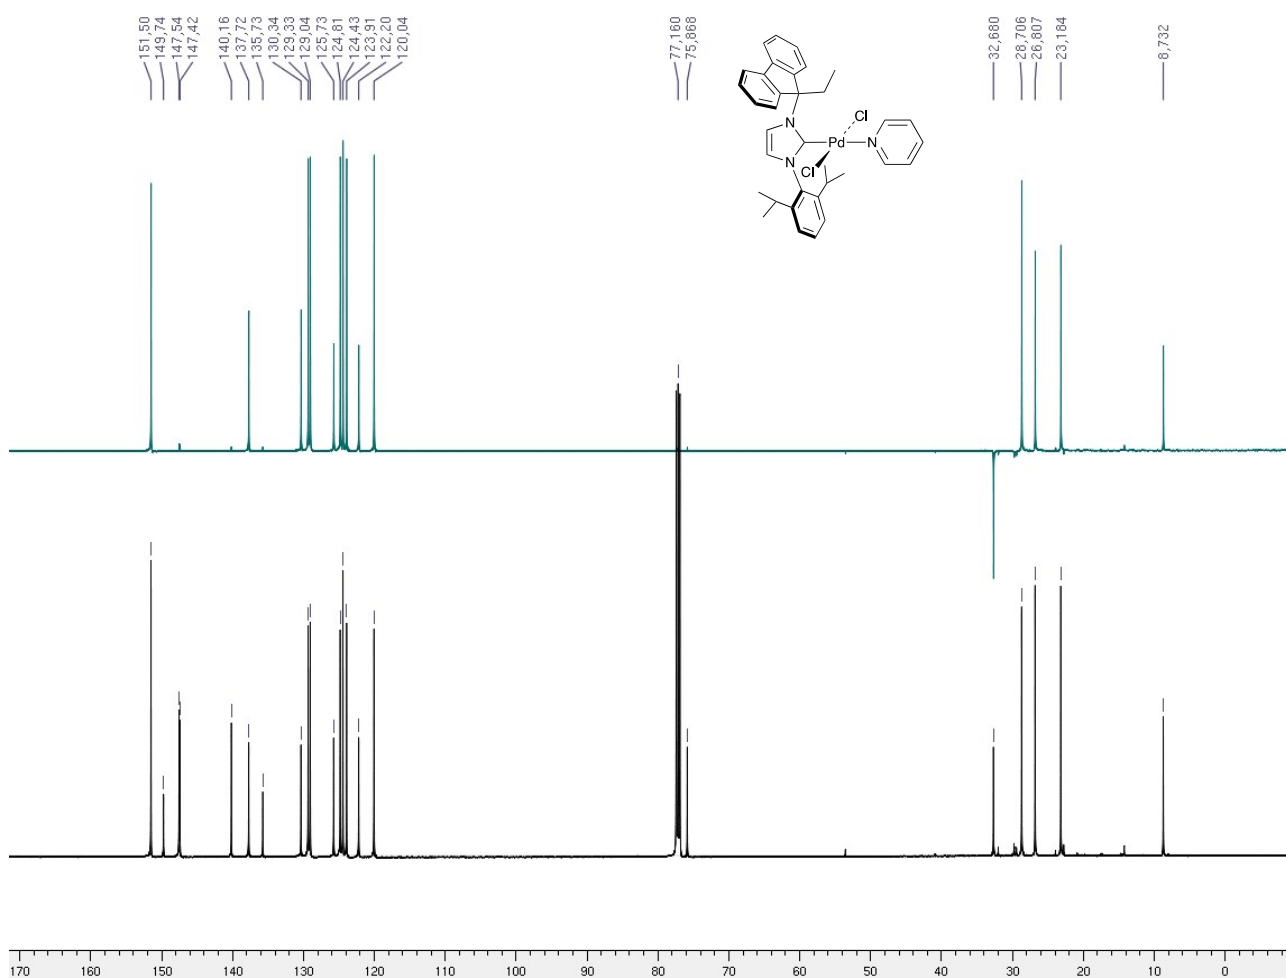

$^1\text{H}$  NMR ( $\text{CDCl}_3$ , 500 MHz) of complex **5Pr**

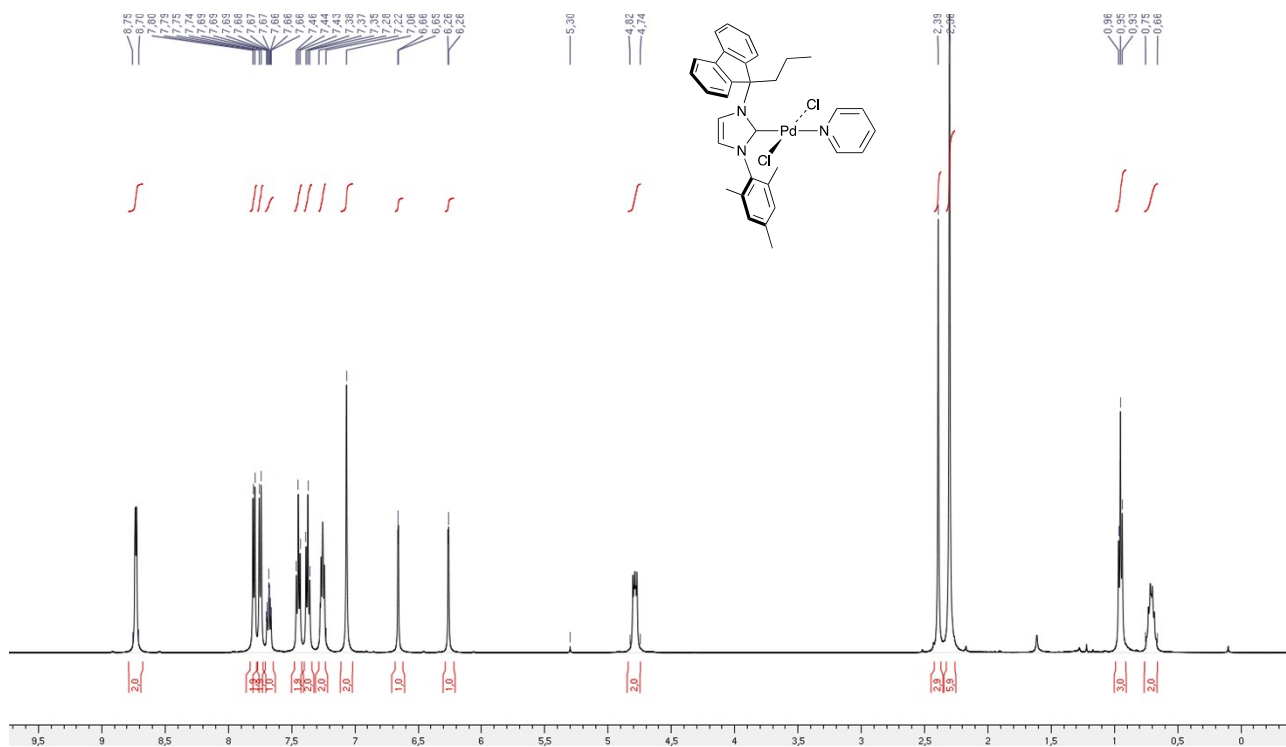

$^{13}\text{C}\{^1\text{H}\}$  and DEPT NMR ( $\text{CDCl}_3$ , 125 MHz) of complex **5Pr**

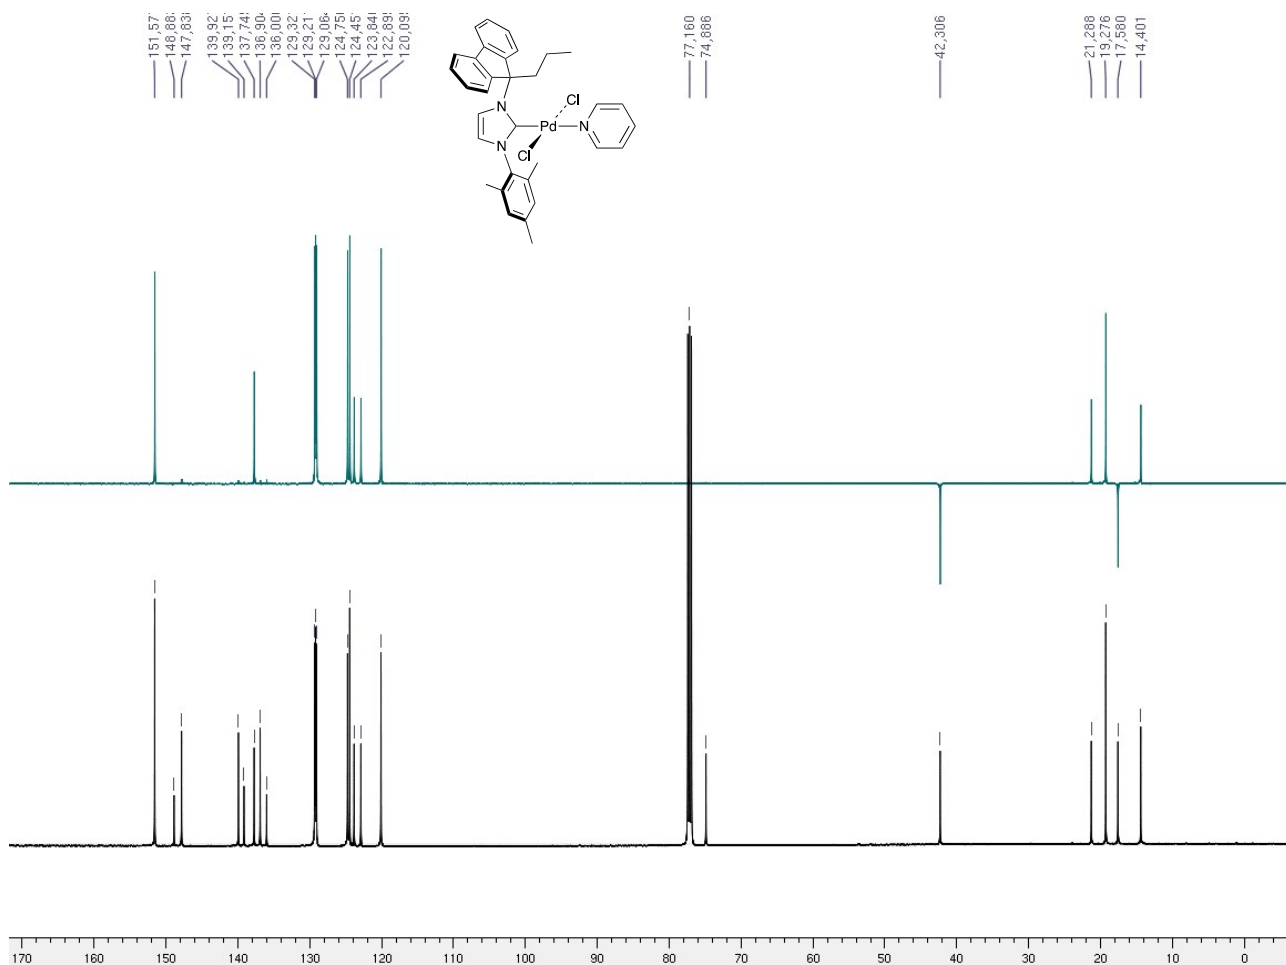

$^1\text{H}$  NMR ( $\text{CDCl}_3$ , 400 MHz) of complex **6Pr**

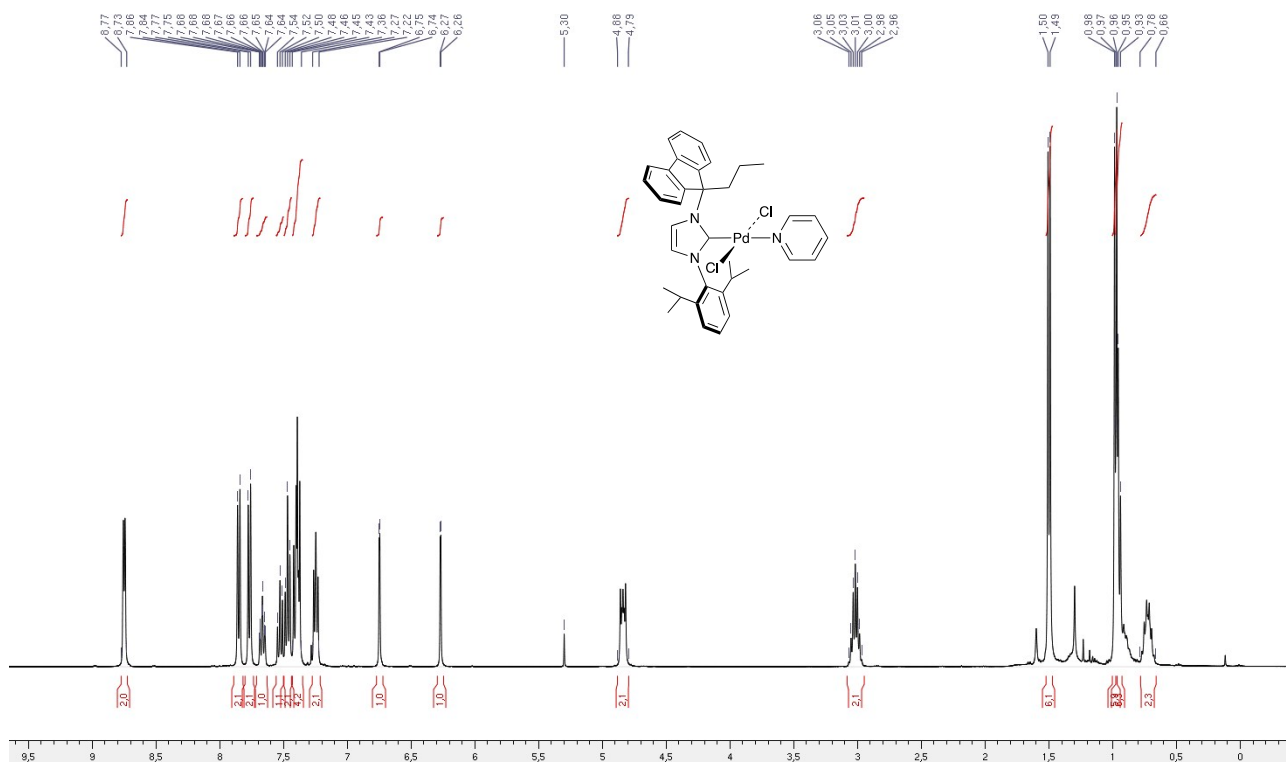

$^{13}\text{C}\{^1\text{H}\}$  and DEPT NMR ( $\text{CDCl}_3$ , 125 MHz) of complex **6Pr**

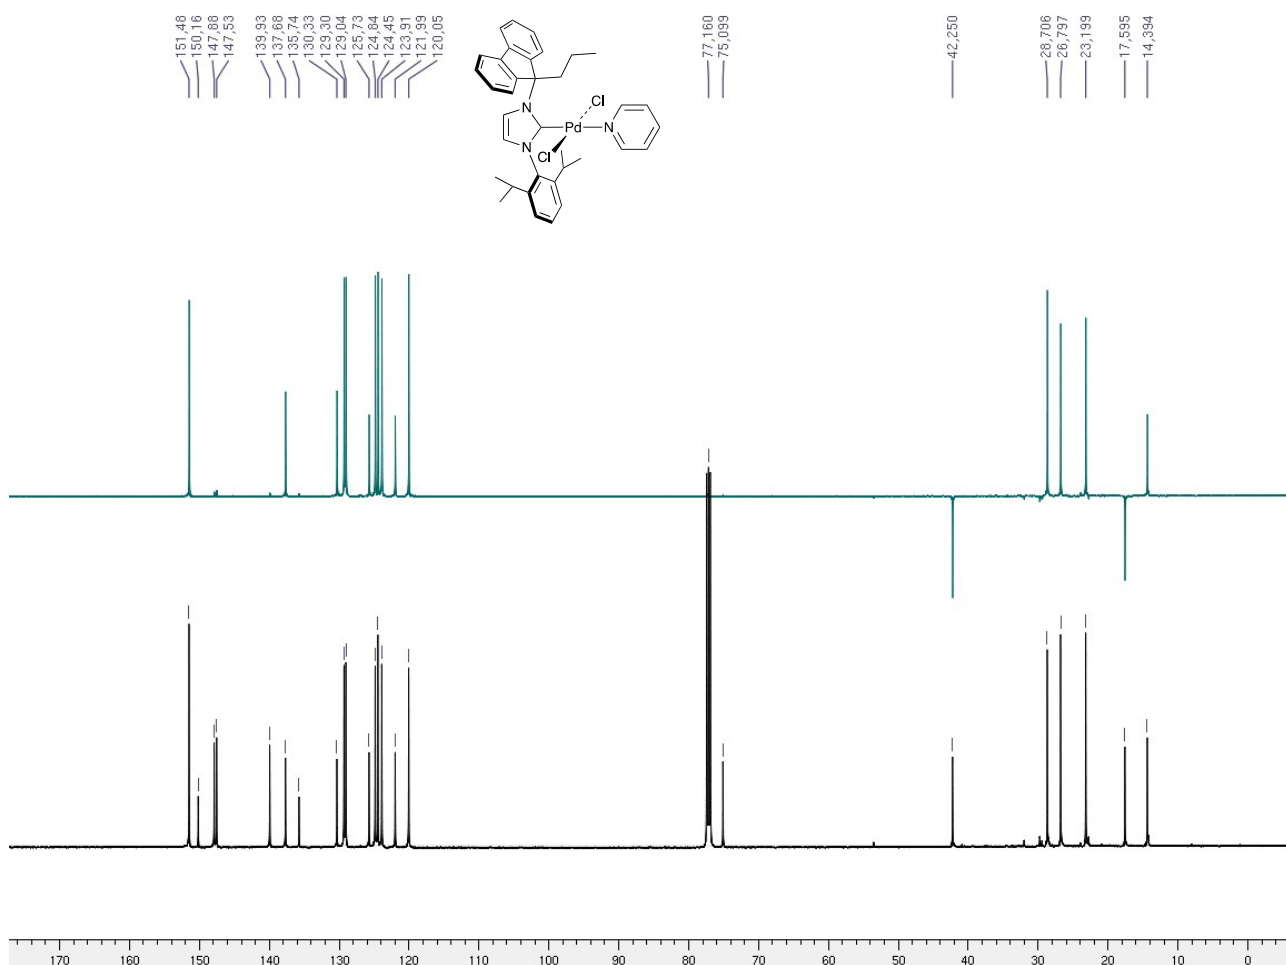

$^1\text{H}$  NMR ( $\text{CDCl}_3$ , 400 MHz) of complex **5<sup>EOM</sup>**

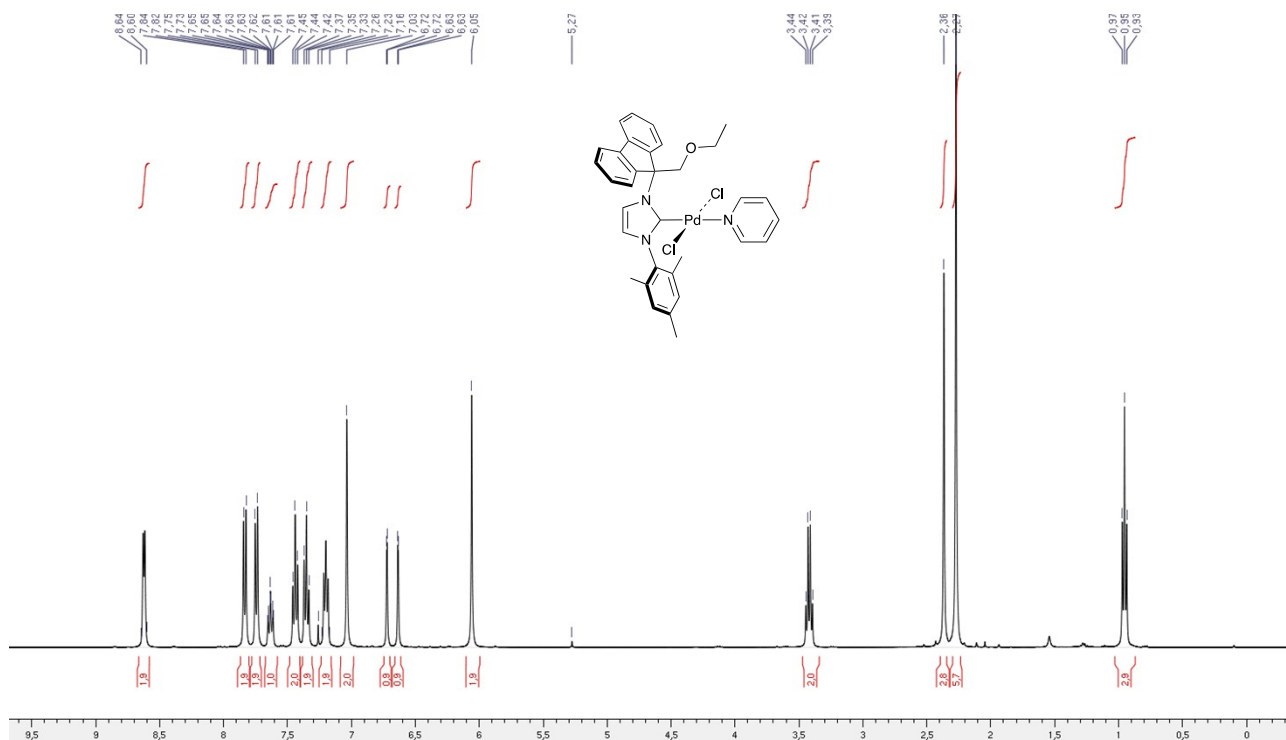

$^{13}\text{C}\{^1\text{H}\}$  and DEPT NMR ( $\text{CDCl}_3$ , 125 MHz) of complex **5<sup>EOM</sup>**

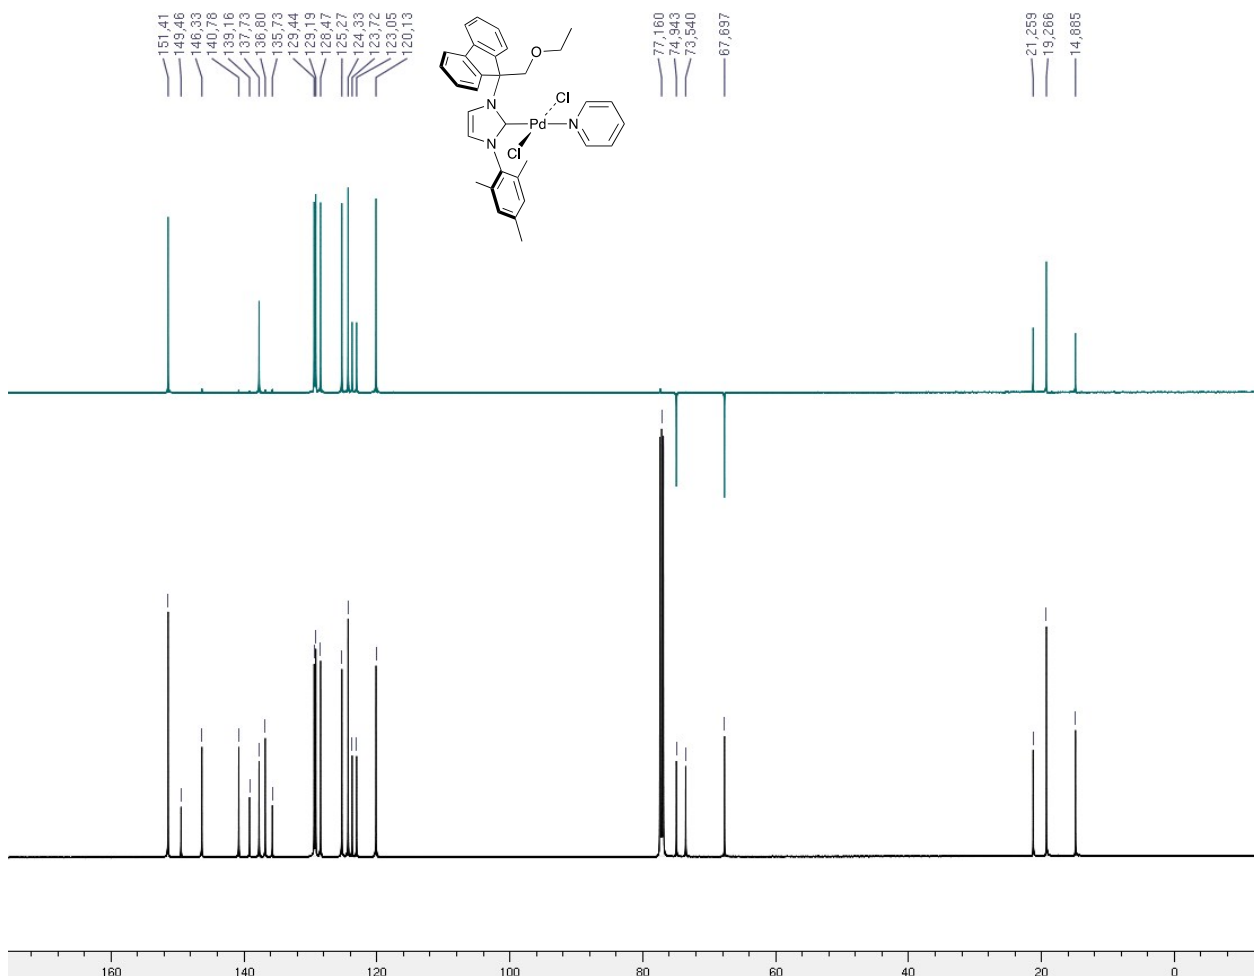

<sup>1</sup>H NMR (CDCl<sub>3</sub>, 500 MHz) of complex **6<sup>EOM</sup>**

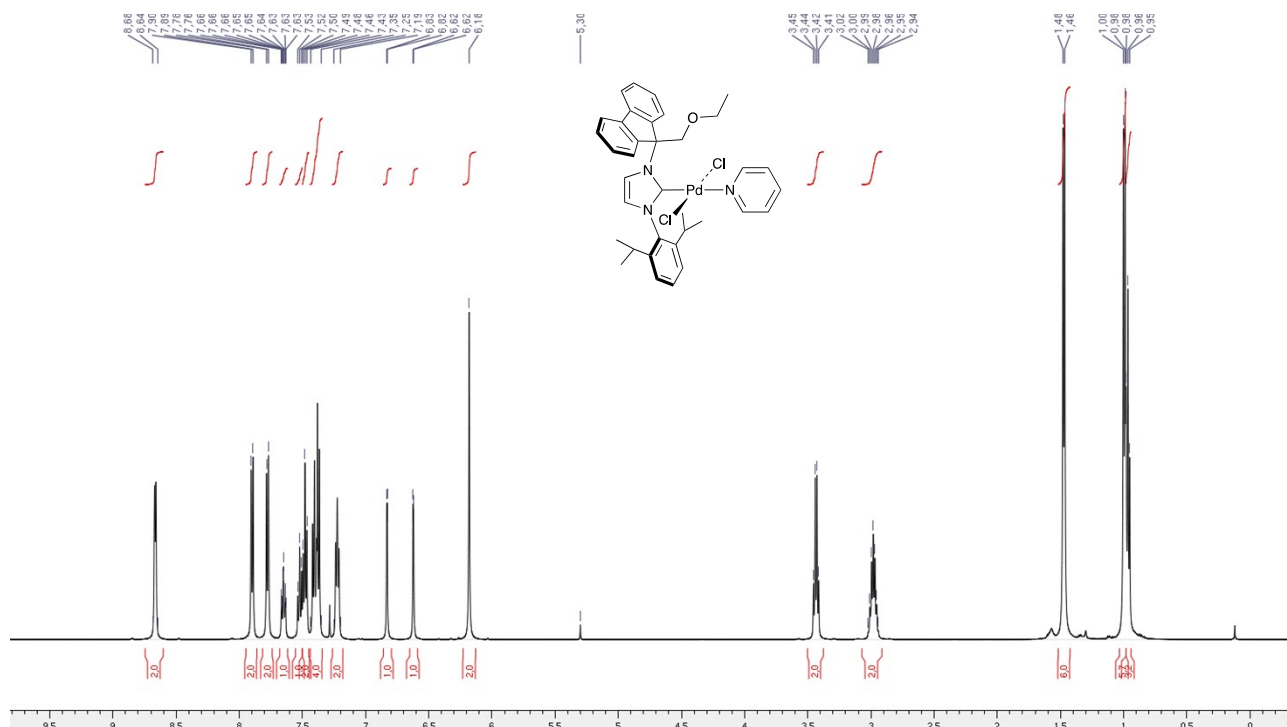

<sup>13</sup>C {<sup>1</sup>H} and DEPT NMR (CDCl<sub>3</sub>, 125 MHz) of complex **6<sup>EOM</sup>**

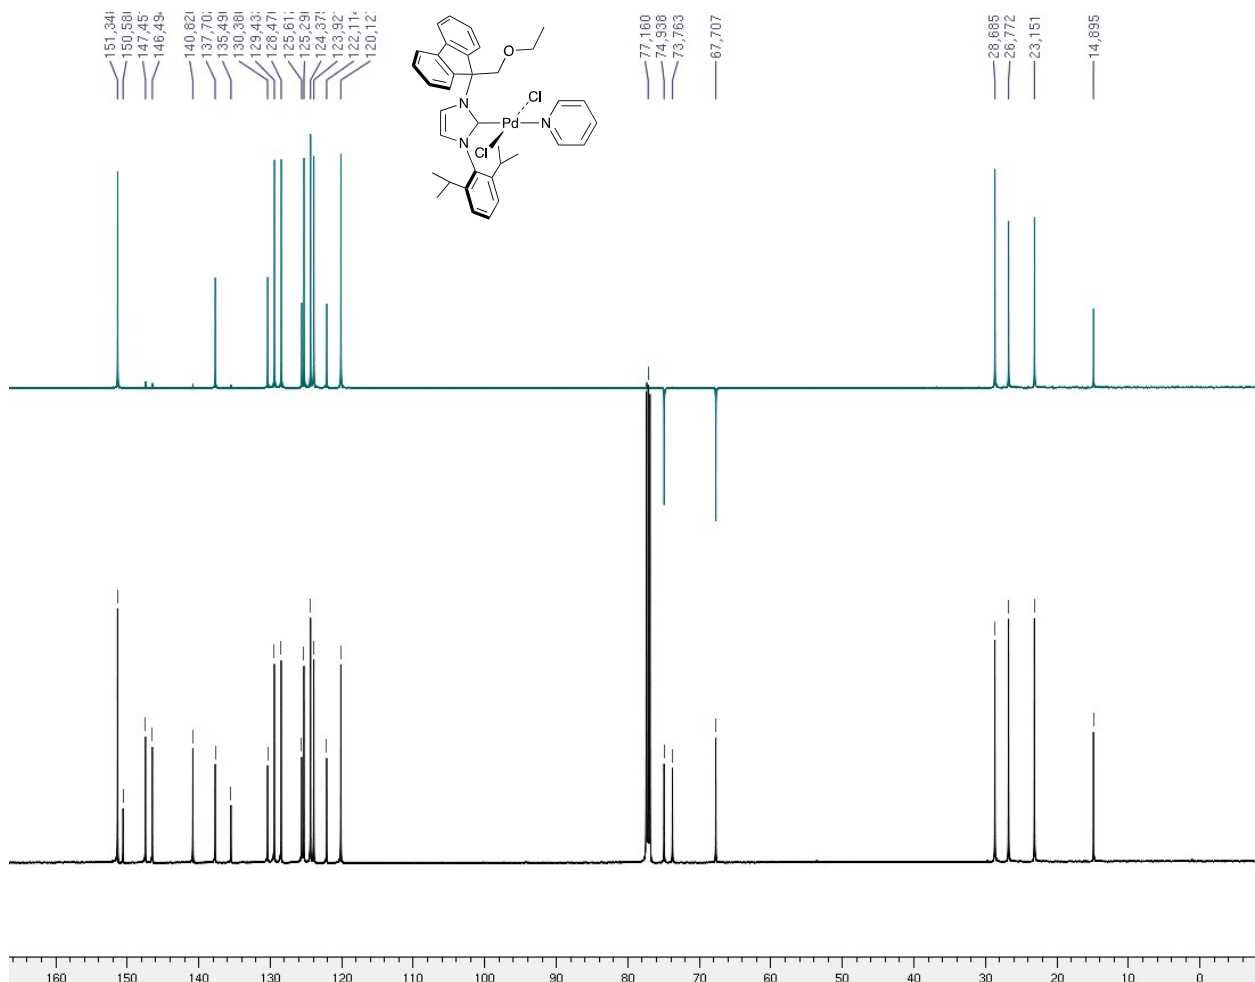

$^1\text{H}$  NMR ( $[\text{D}_6]$ DMSO, 500 MHz) of imidazolium  $7^{\text{H}}$

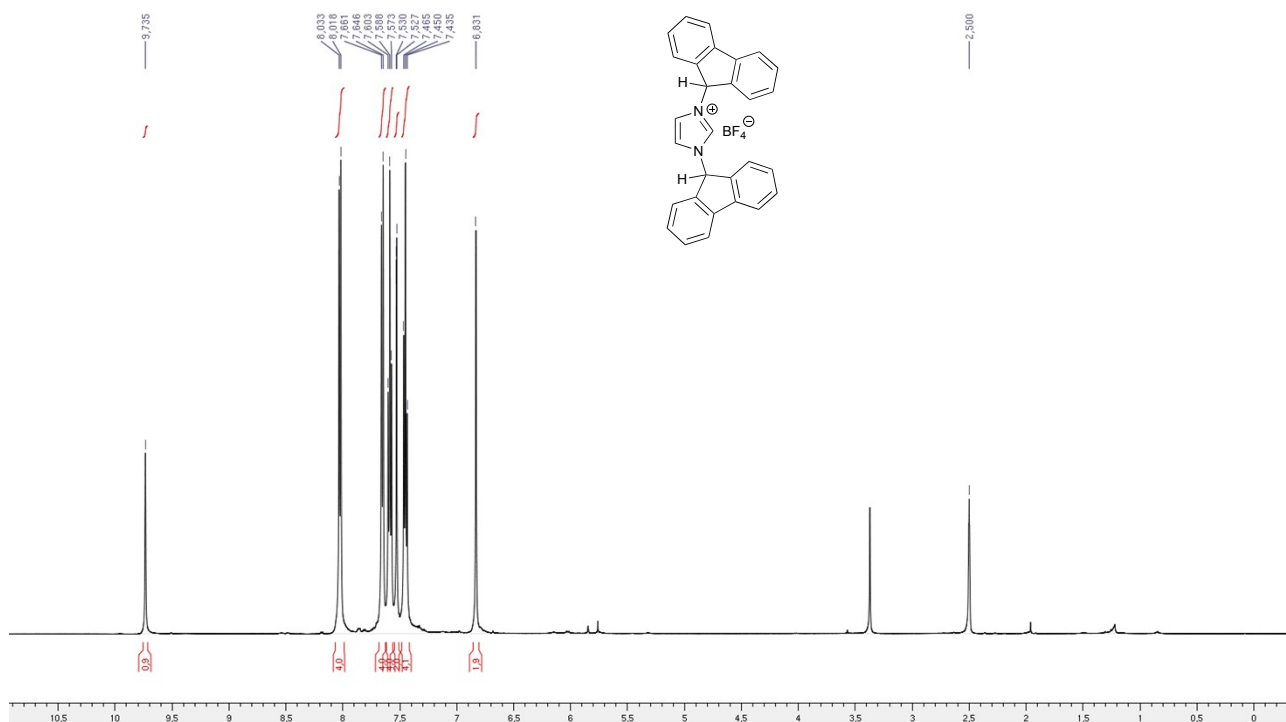

$^{13}\text{C}\{^1\text{H}\}$  and DEPT NMR ( $[\text{D}_6]$ DMSO, 125 MHz) of imidazolium  $7^{\text{H}}$

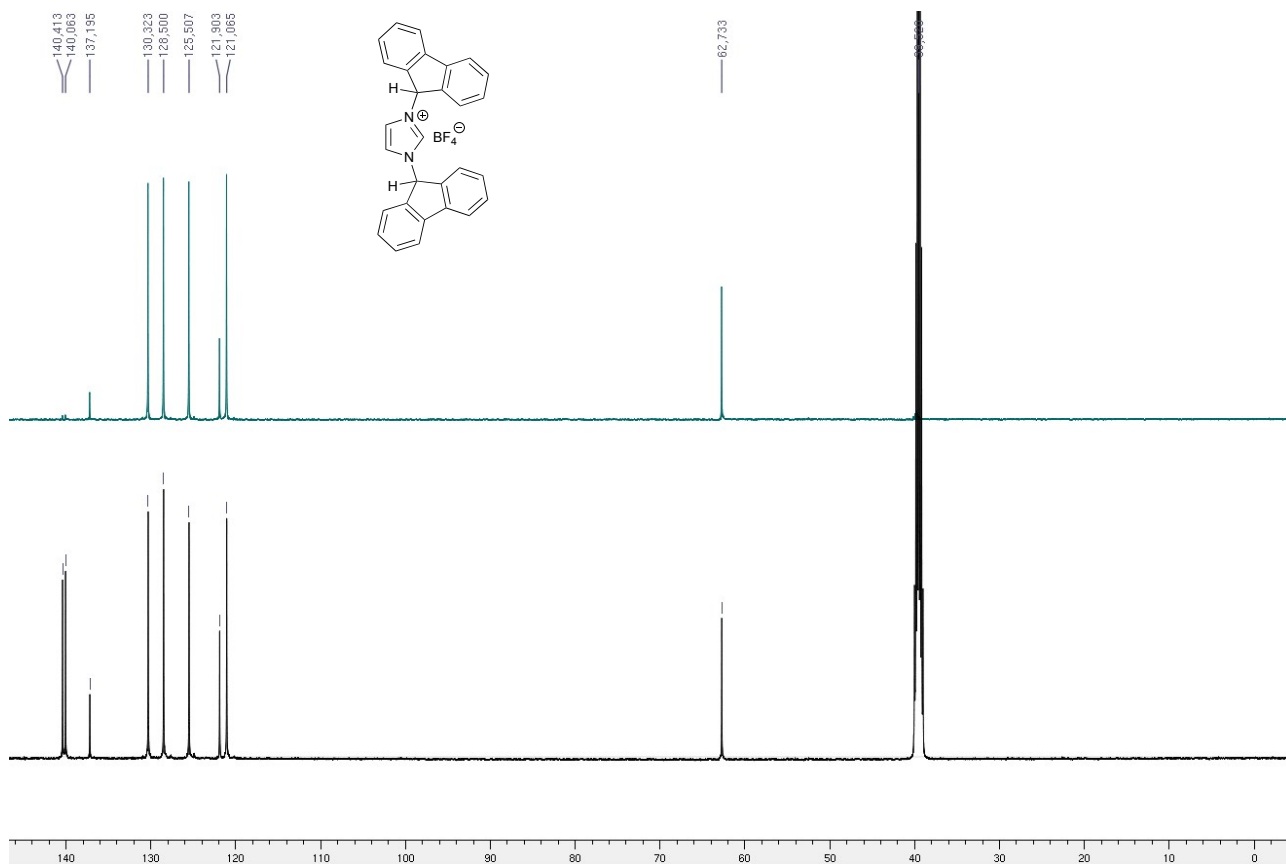

$^{19}\text{F}$  NMR ( $[\text{D}_6]$ DMSO, 282 MHz) of imidazolium **7<sup>H</sup>**

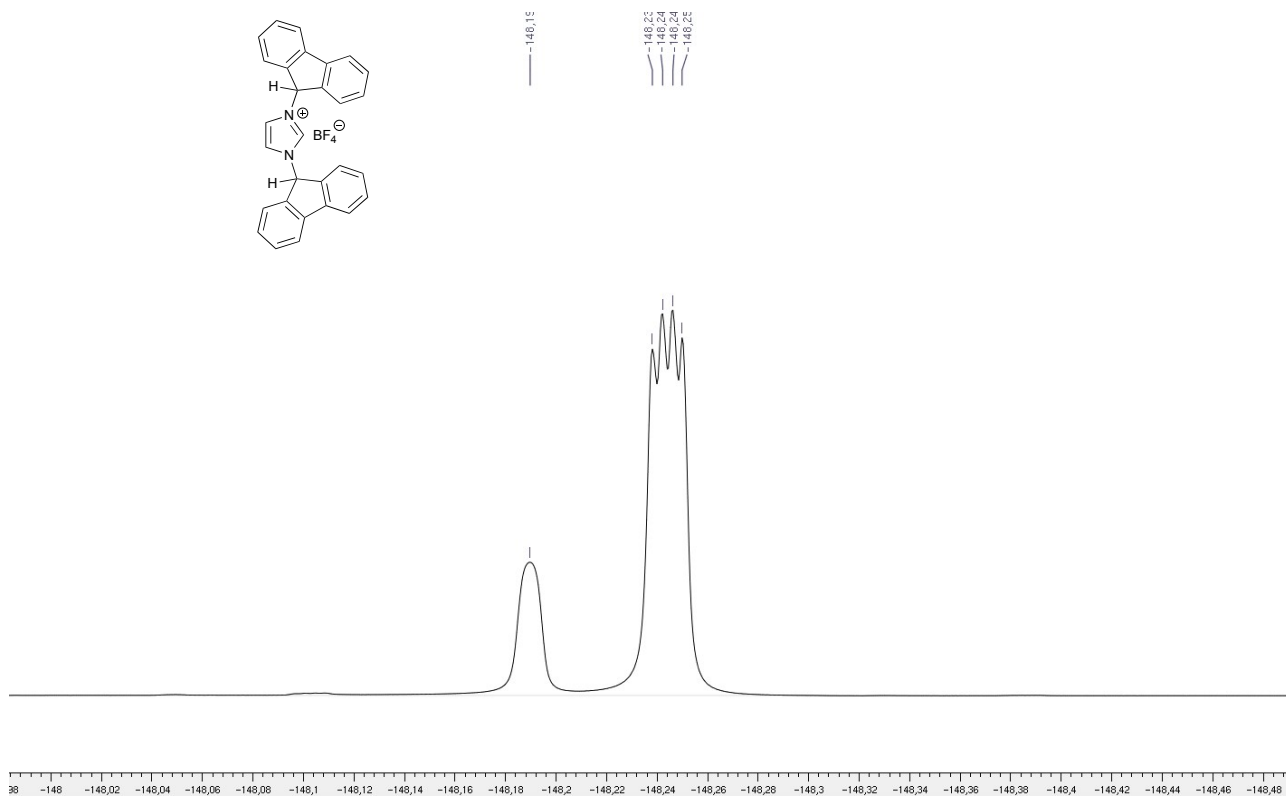

$^1\text{H}$  NMR ( $\text{CDCl}_3$ , 400 MHz) of imidazolium **8<sup>Me</sup>**

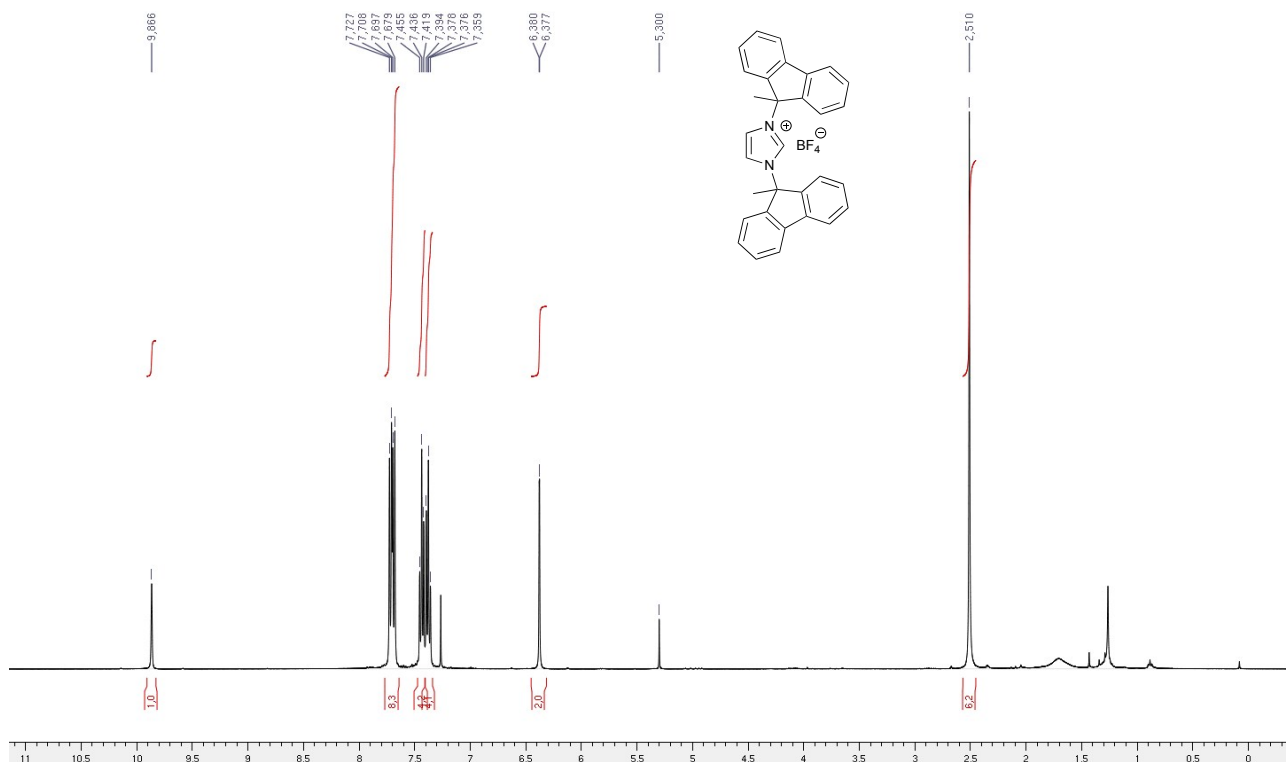



$^{13}\text{C}\{^1\text{H}\}$  and DEPT NMR ( $\text{CDCl}_3$ , 125 MHz) of imidazolium **8**<sup>Me</sup>

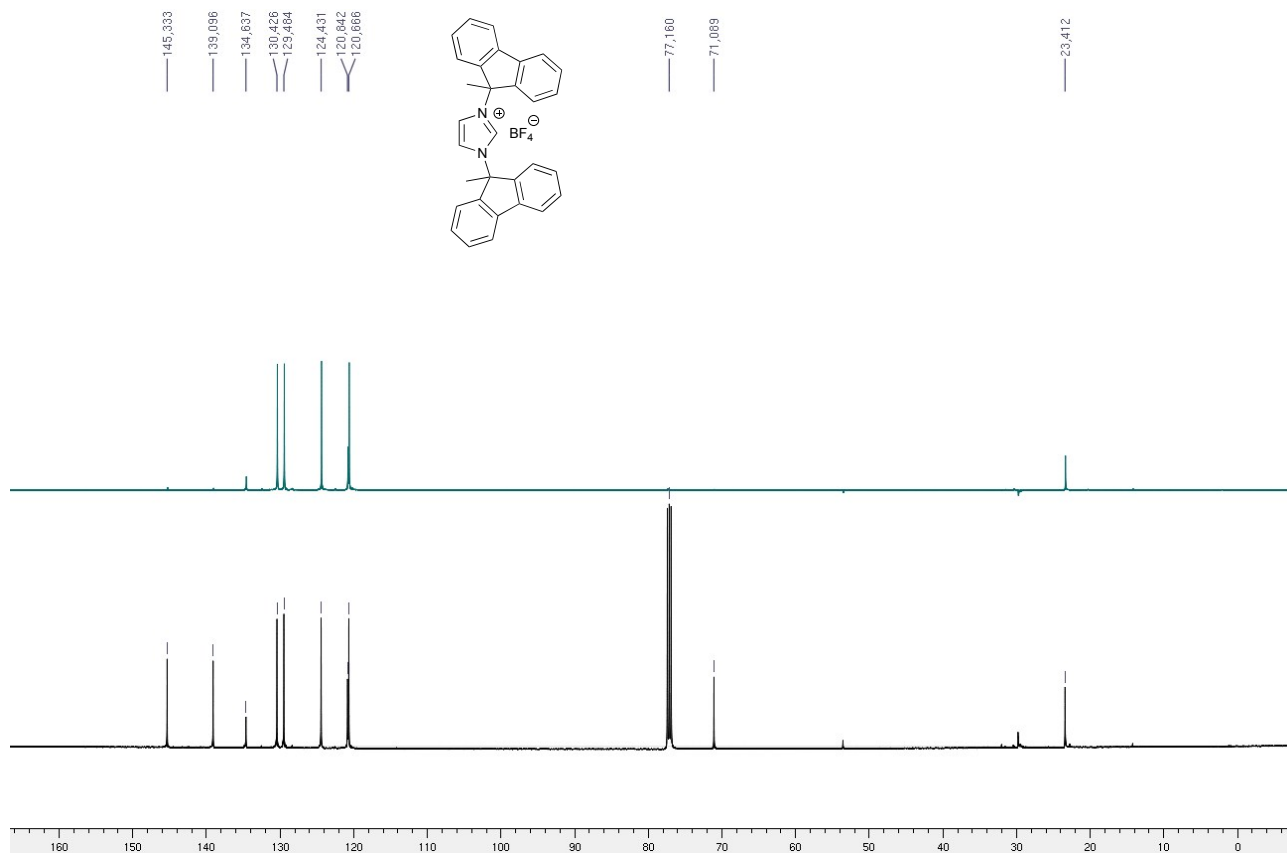

$^{19}\text{F}$  NMR ( $\text{CDCl}_3$ , 470 MHz) of imidazolium **8**<sup>Me</sup>

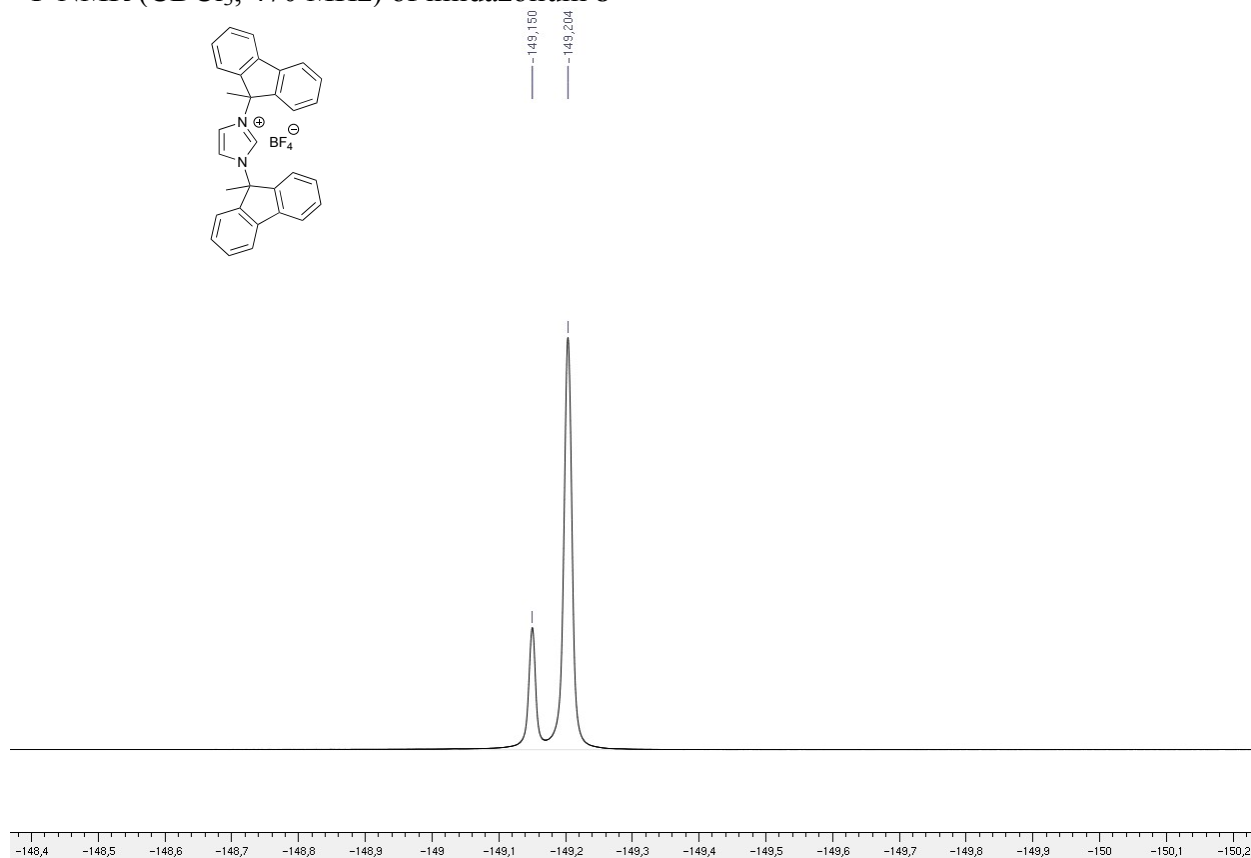

$^1\text{H}$  NMR ( $\text{CDCl}_3$ , 500 MHz) of imidazolium **8<sup>Et</sup>**

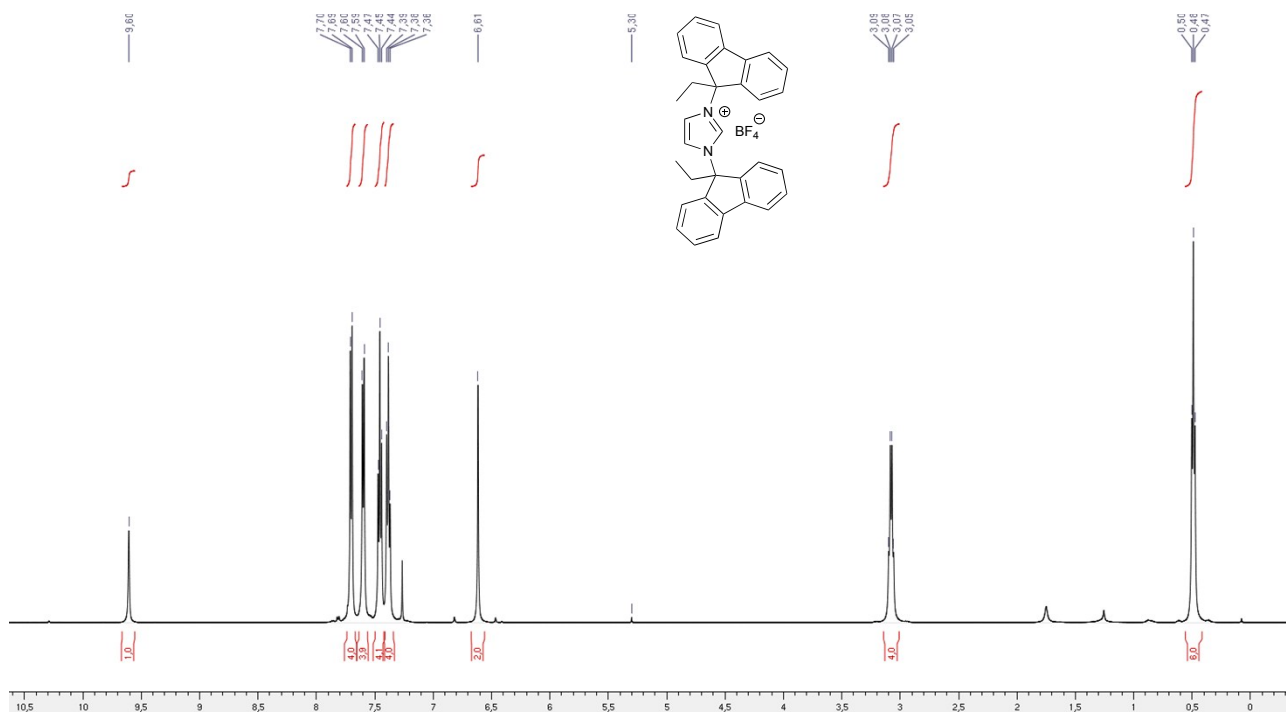

$^{13}\text{C}\{^1\text{H}\}$  and DEPT NMR ( $\text{CDCl}_3$ , 125 MHz) of imidazolium **8<sup>Et</sup>**

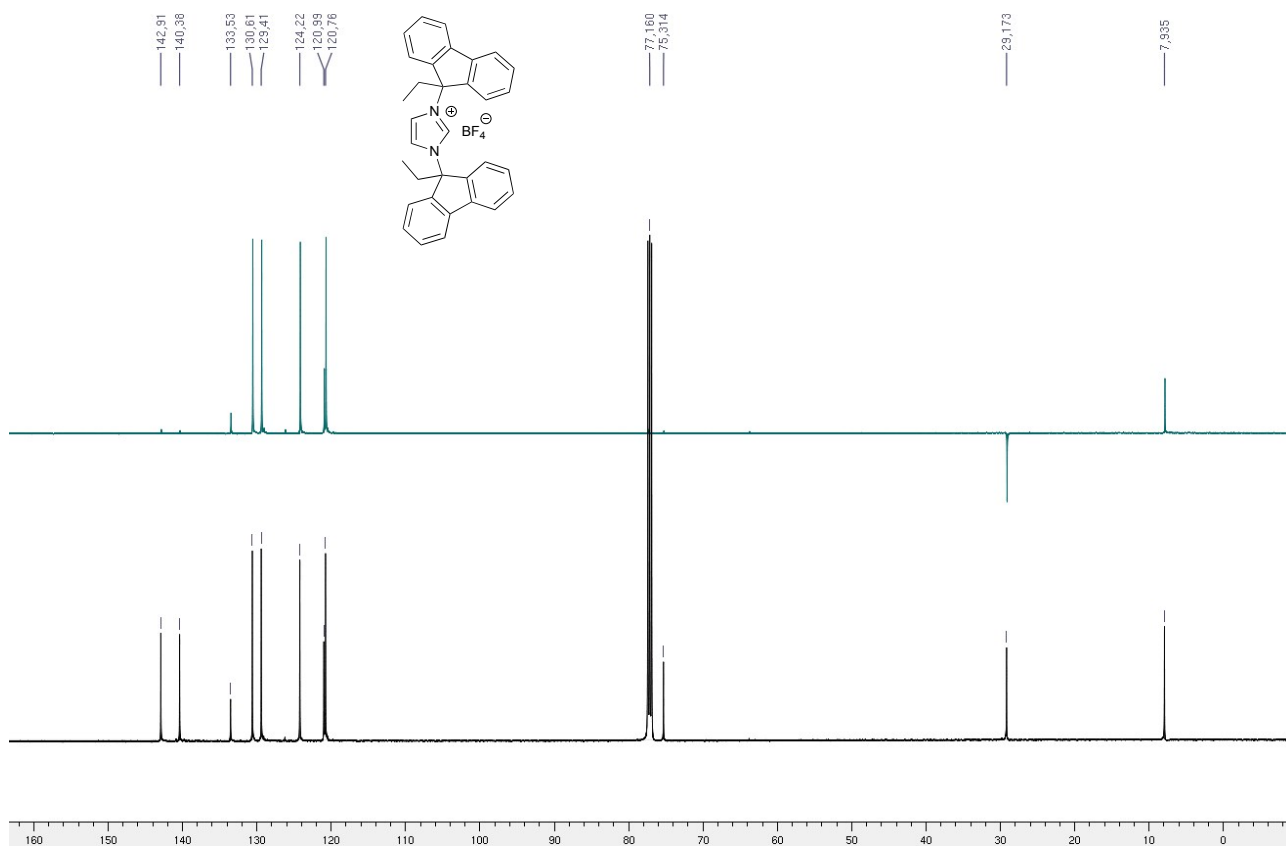

$^{19}\text{F}$  NMR ( $\text{CDCl}_3$ , 282 MHz) of imidazolium **8<sup>Et</sup>**

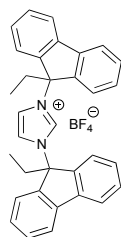

— -151,543  
— -151,568  
— -151,620

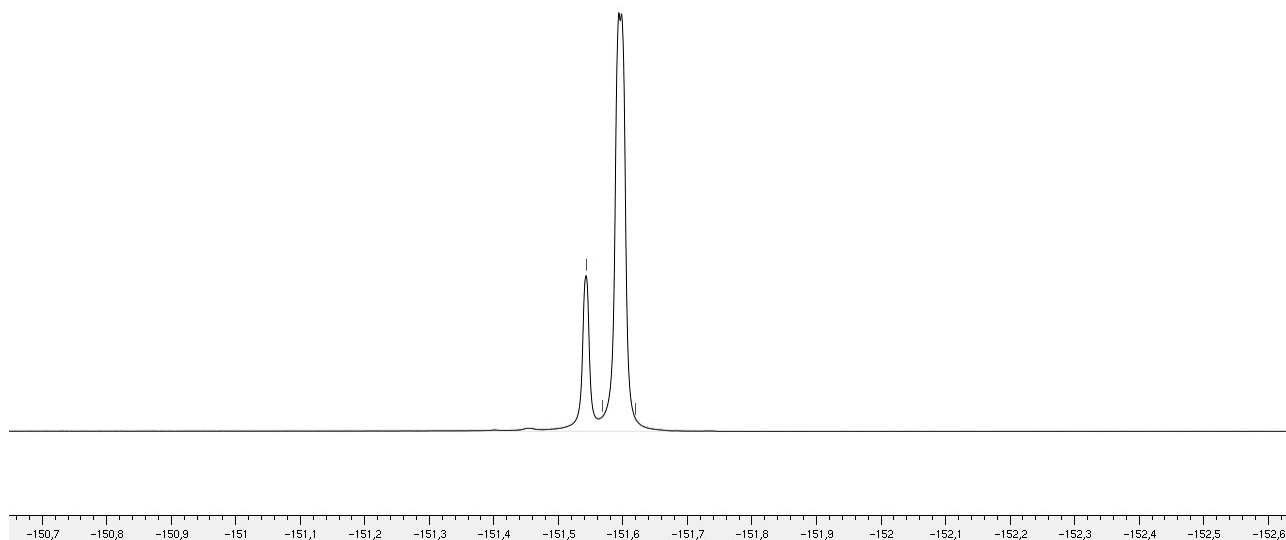

$^1\text{H}$  NMR ( $\text{CDCl}_3$ , 500 MHz) of imidazolium **8<sup>Pr</sup>**

9.85  
9.84  
9.84

7.76  
7.65  
7.65  
7.58  
7.48  
7.44  
7.38  
7.38  
7.21  
7.21

6.58  
6.58

3.02  
2.97

0.86  
0.85  
0.82  
0.71  
0.71

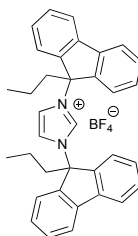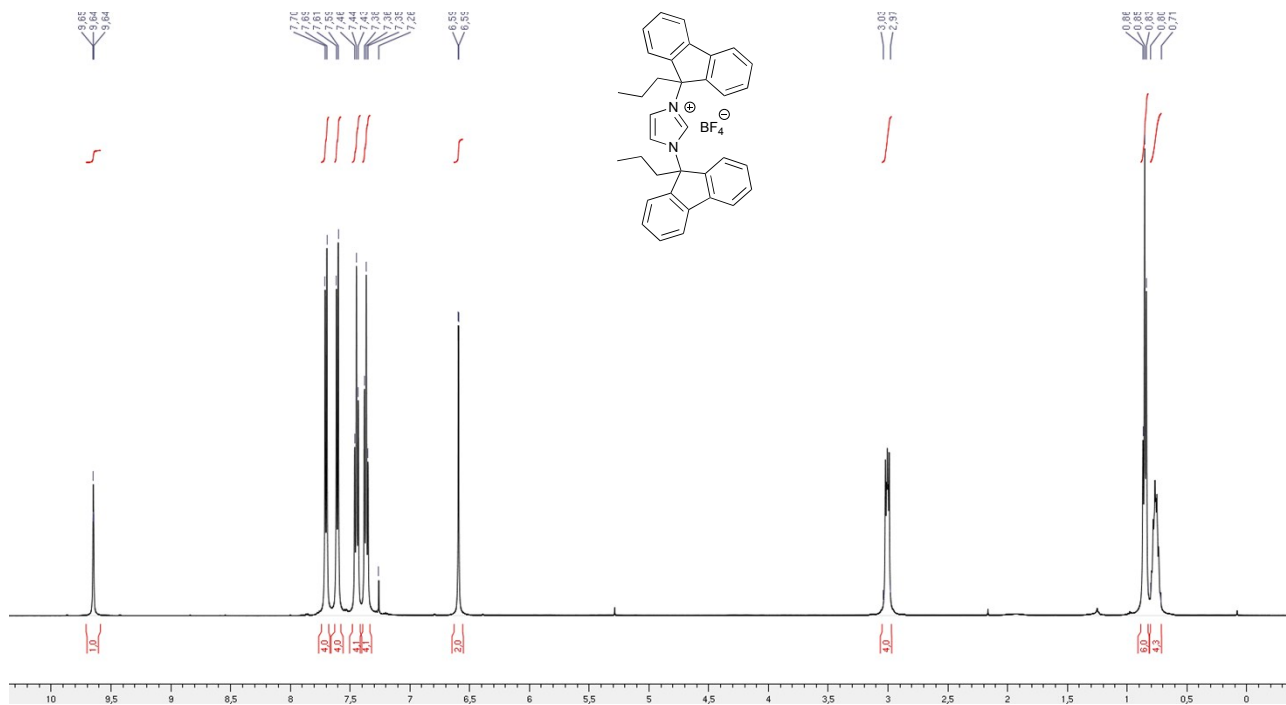

$^{13}\text{C}\{^1\text{H}\}$  and DEPT NMR ( $\text{CDCl}_3$ , 125 MHz) of imidazolium **8Pr**

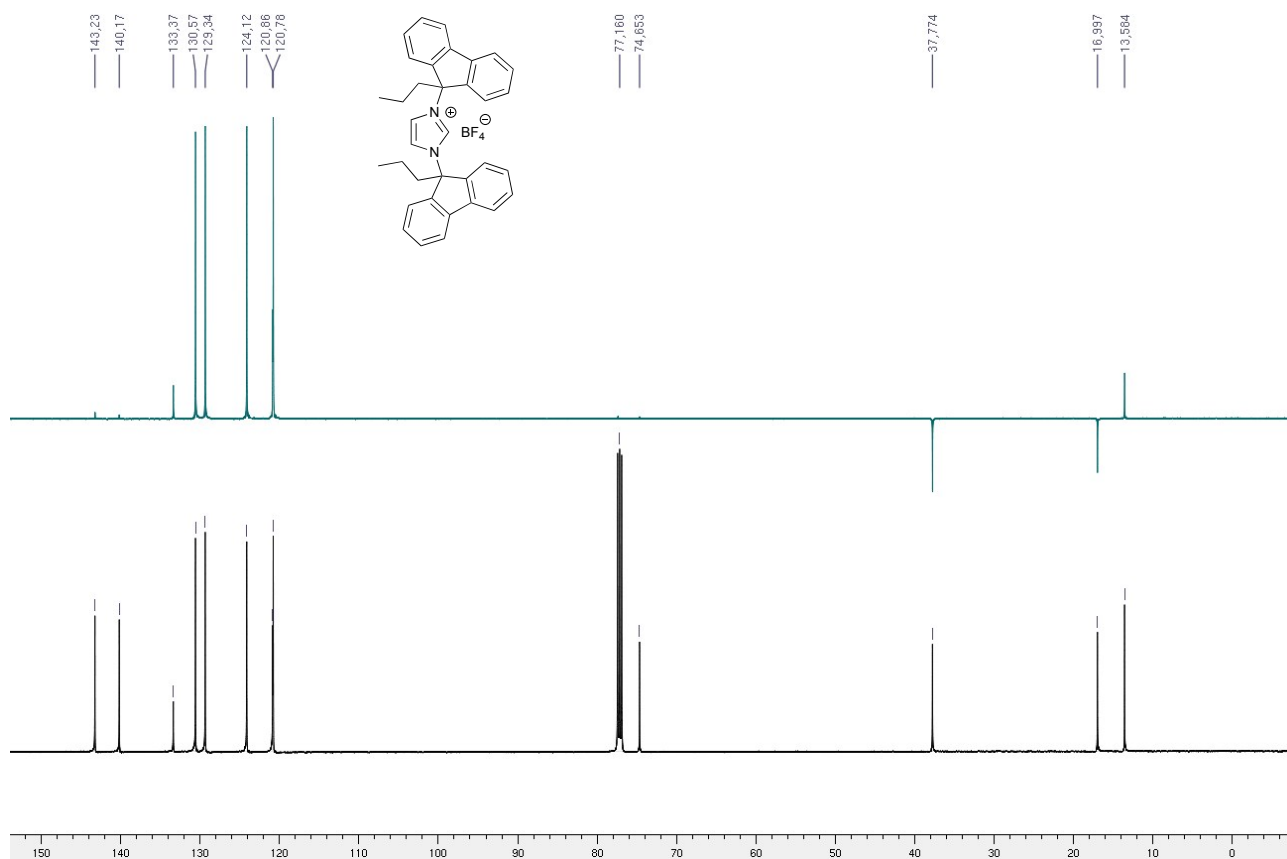

$^{19}\text{F}$  NMR ( $\text{CDCl}_3$ , 282 MHz) of imidazolium **8Pr**

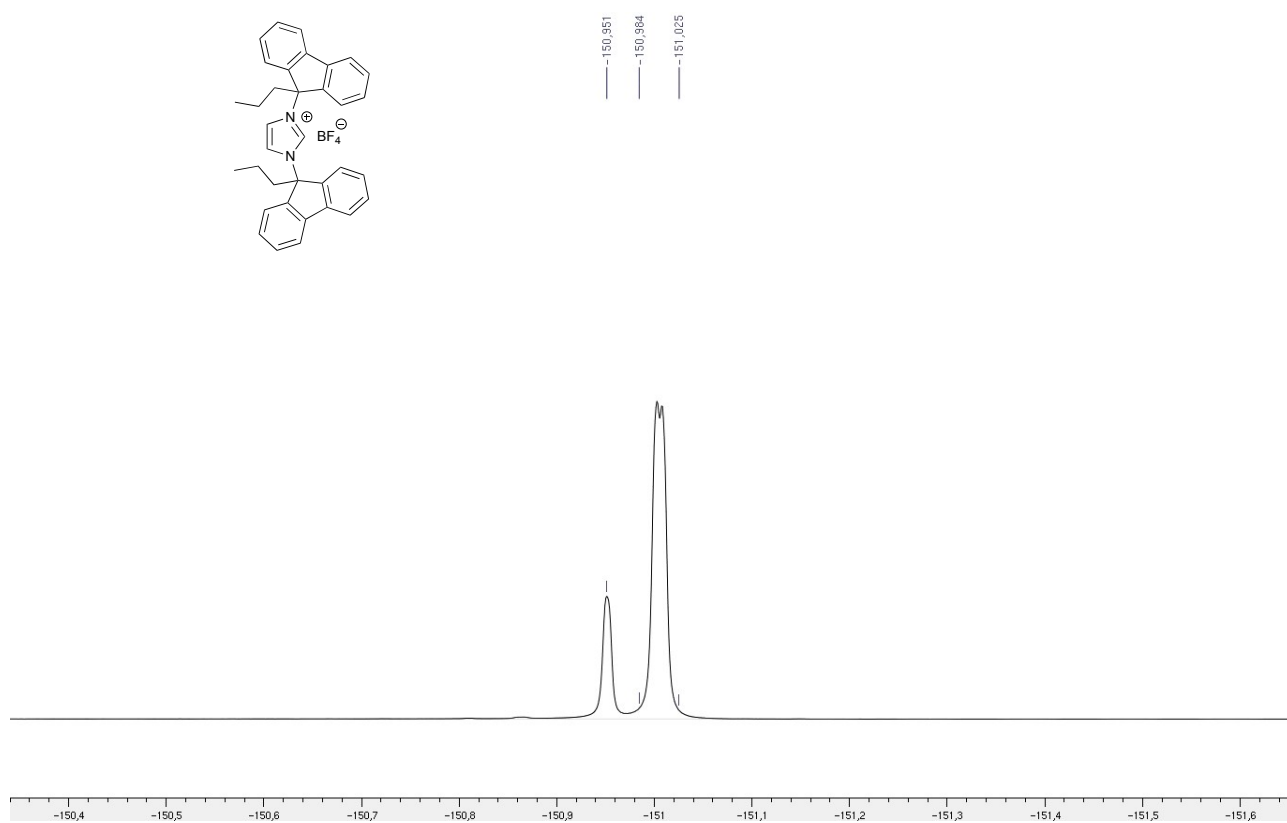

$^1\text{H}$  NMR ( $\text{CDCl}_3$ , 500 MHz) of complex **9Me**

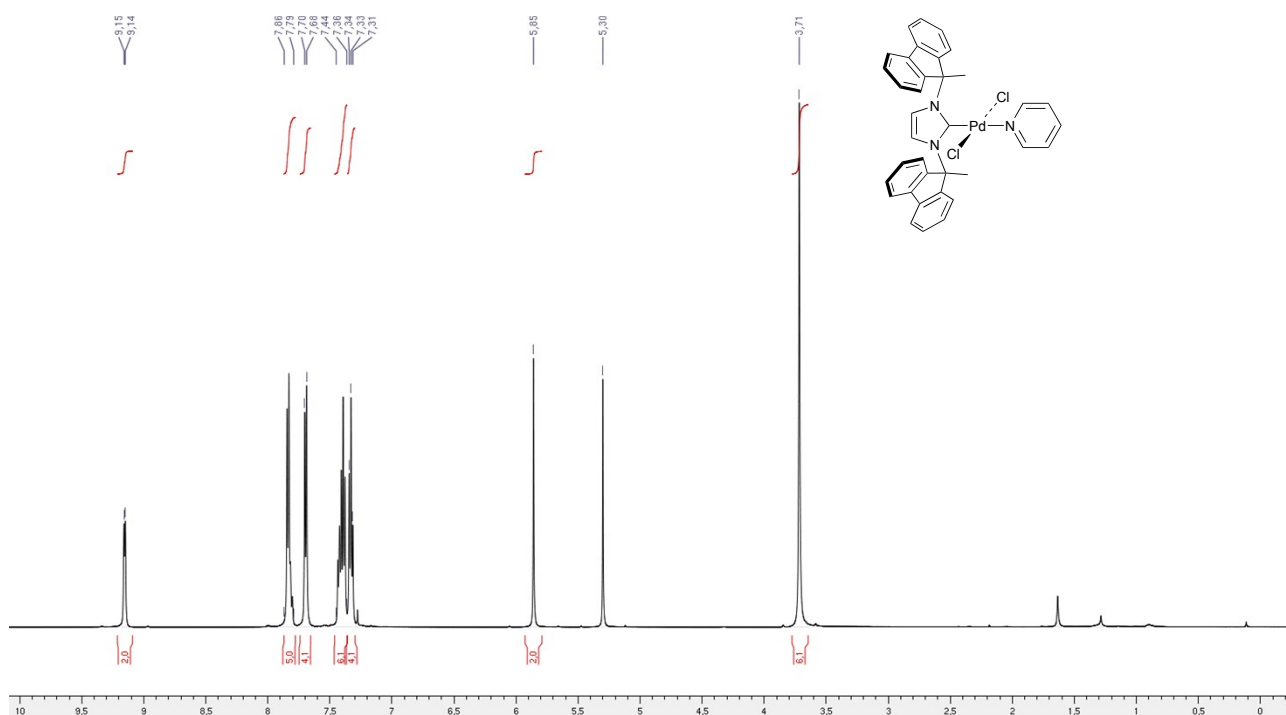

$^{13}\text{C}\{^1\text{H}\}$  and DEPT NMR ( $\text{CDCl}_3$ , 125 MHz) of complex **9Me**

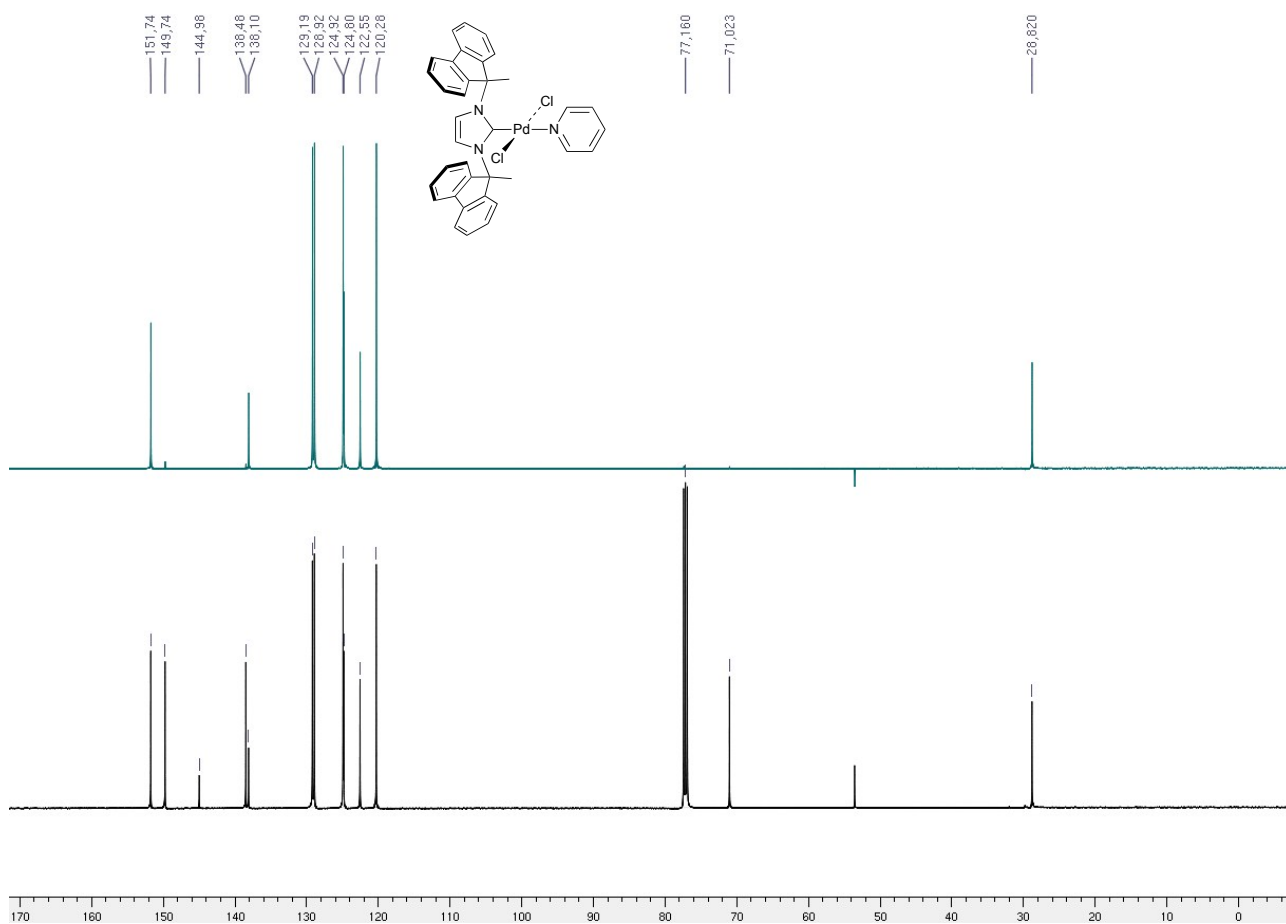

$^1\text{H}$  NMR ( $\text{CDCl}_3$ , 400 MHz) of complex **9Et**

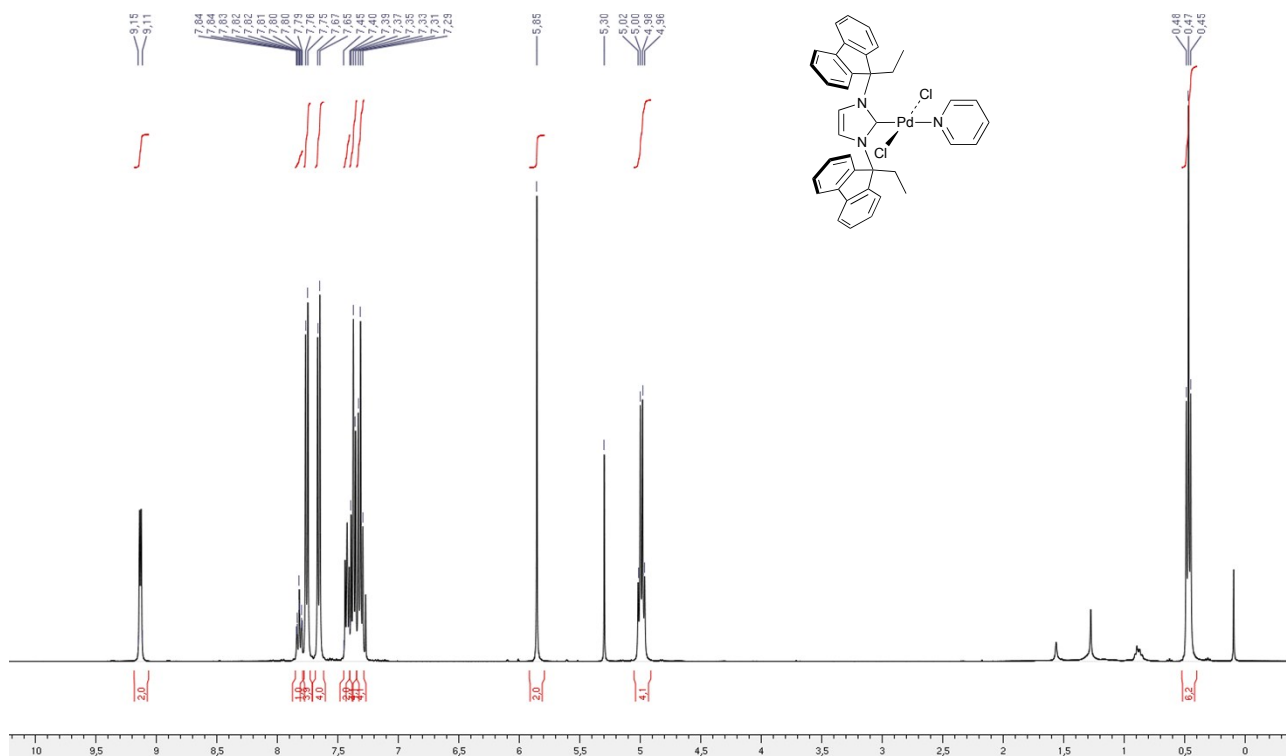

$^1\text{H}$  NMR ( $\text{CDCl}_3$ , 500 MHz) of complex **9Pr**

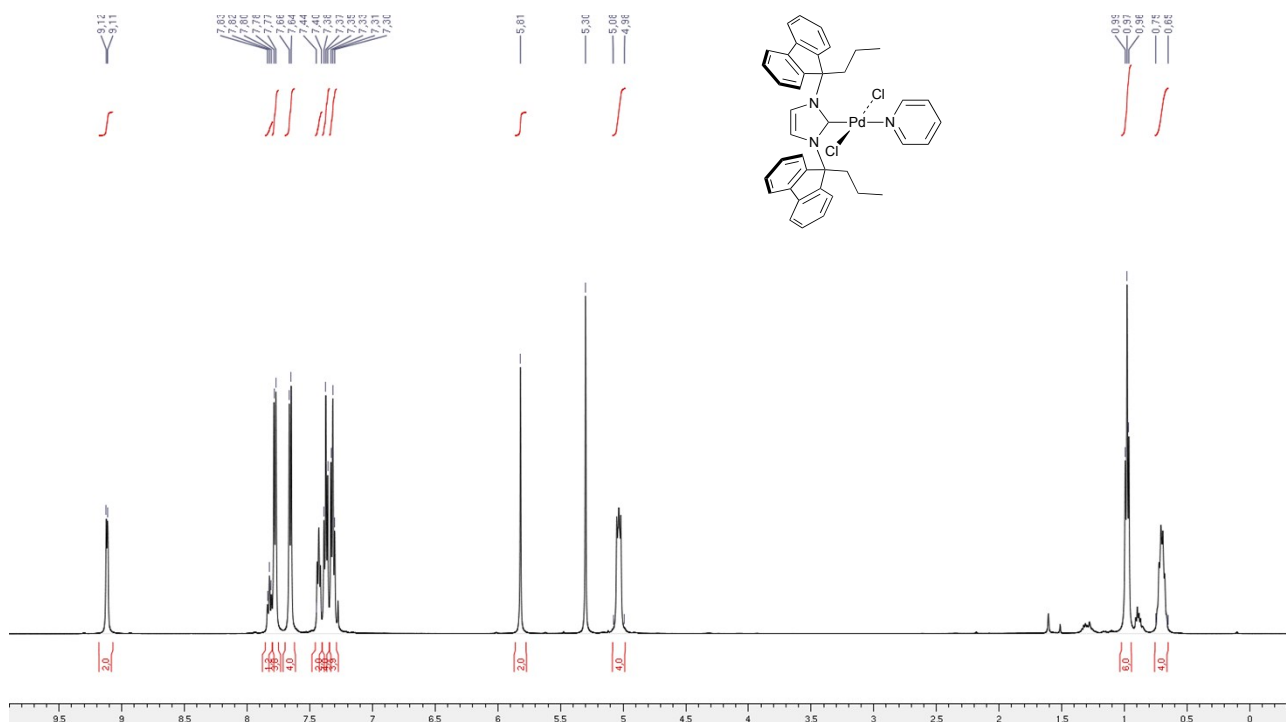

$^{13}\text{C}\{^1\text{H}\}$  and DEPT NMR ( $\text{CDCl}_3$ , 125 MHz) of complex **9Pr**

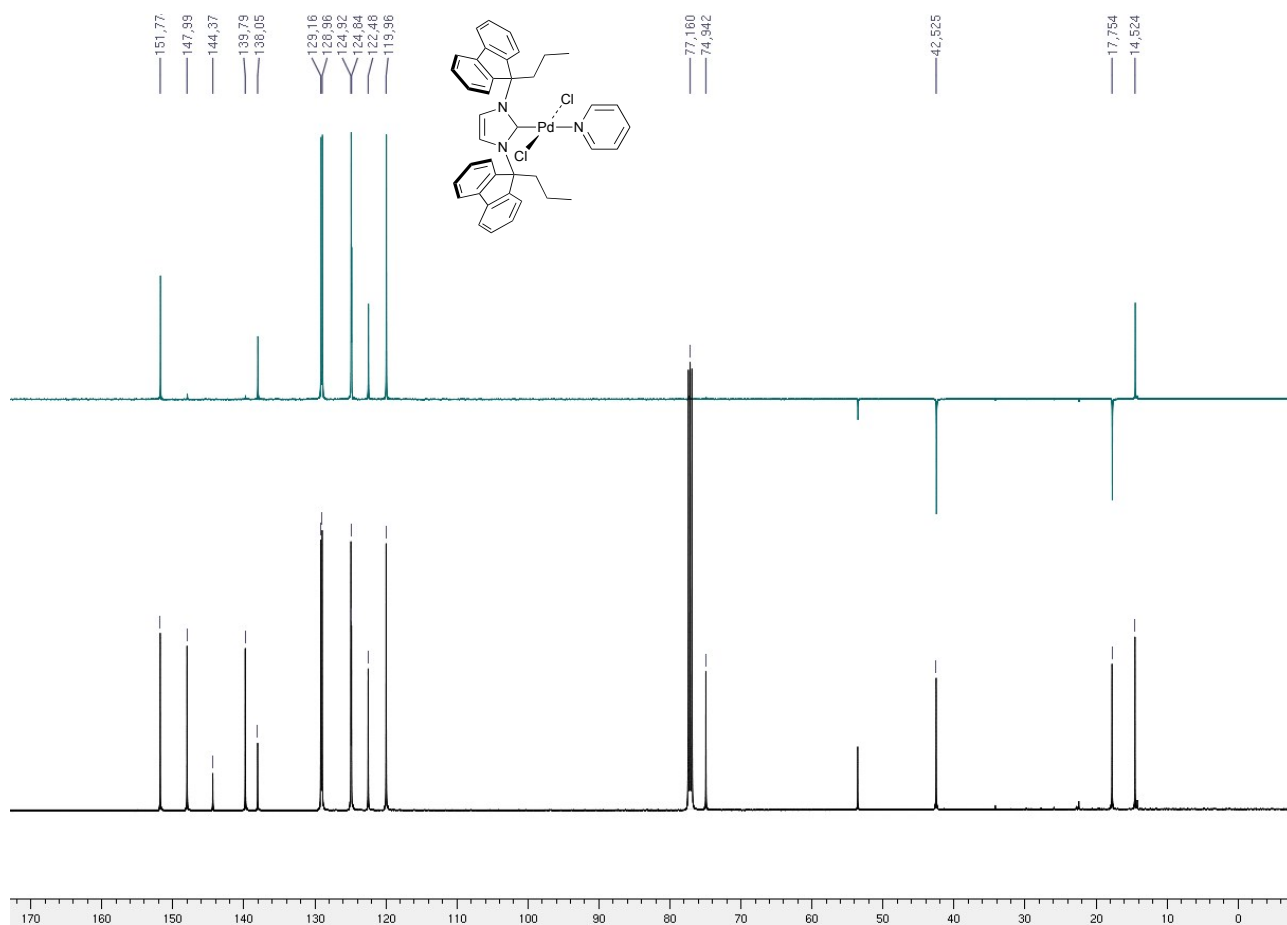

Supplement: c9dt02948f1.pdf [file c9dt02948f1.pdf]
